# Supplementary material for: The Growth, Decline, and Transformation of the Diaconal Ministry and the Role of Women Deaconesses in the Early Churches
Source: MDPI journal article supplement (doi:10.3390/rel14111415), 2023-11-12
Supplement: s1 [file s1]

Archive with 16 entries (16 files):
- Bradshaw 1999.pdf
- Burkitt 1930.pdf
- Chae 2013.pdf
- Dietrich 2016.pdf
- Ferguson 1999.pdf
- Miller 2005-1.pdf
- Miller 2005-2.pdf
- Nessan 2013.pdf
- O.Kim 2015.pdf
- Peppard 2016.pdf
- Ruether 2014.pdf
- Ruether and McLaughln 1998.pdf
- Schenk 2017.pdf
- Shoemaker 2008.pdf
- Vyhmeister 2005.pdf
- Wijngaards 2011.pdf
