# Supplementary material for: The Growth, Decline, and Transformation of the Diaconal Ministry and the Role of Women Deaconesses in the Early Churches
Source: MDPI journal article supplement (doi:10.3390/rel14111415), 2023-11-12
Supplement: s1 [file s1]

## 초대교회의 여성성직제도 ‘과부’의 역할과 지위

채승희(영남신학대학 역사신학 조교수)

### I. 들어가는 말

본고에서 우리는 초대교회에 여성들이 성직자로 임명되어 목회와 예전 사역에 동참할 수 있었던 ‘과부’의 직제에 대해 살펴보려고 한다. 지역과 시대에 따라, 혹은 개별 교회의 상황에 따라 그 직제에 대한 인식과 활용은 다소 차이를 보이기도 하지만, ‘과부’는 초대교회에서 여성들에게 부여된 성직제도였고, 이를 통해 여성들은 활발하게 사역을 펼쳤다.

사전적 의미에서 과부(widow)란 결혼한 여인이 이혼이나 사망으로 남편을 잃게 되어 혼자가 된 상태를 말하지만, 구약시대와 1세기 팔레스틴과 그리스-로마의 지중해 문화권에서 과부는 버려지고 주목받지 못하는 소외된 계층이라는 인식이 강했다. 히브리어로 과부 (אלמנה, almanah)는 ‘잠잠한 자’ 혹은 ‘말할 수 없는 자’라는 의미를 가진 ‘אלם’ alem 에서 유래한 단어로 자신의 목소리를 낼 수 없는 약자, 열악한 상황에 처해 있는 억압

받는 계층으로 분류되고 있음을 볼 수 있다.<sup>1)</sup> 과부를 지칭하는 헬라어 ‘χήρα’ (chēra)로부터 유래한 것으로 버려진다는 의미가 깔려 있다.<sup>2)</sup> 전반적으로 과부는 자신을 보호하고 부양할 수 있는 변변한 법적 지위와 경제력을 갖추지 못한 사회적 소외 계층으로 인식되었고, 그로 말미암아 언제나 동정과 구제의 대상이었다. 이러한 사회적 약자인 ‘과부’의 명칭이 초대교회 시대에는 그리스도를 위해 스스로 독신의 길을 택하여 헌신하는 여성들을 총체적으로 지칭하는 말이 되었고, 제도화된 교회에서 감독이나 장로, 집사처럼 여성에게 부여되는 성직의 하나가 되었다. 여성들은 과부라는 성직을 통해 교회의 사역에 동참할 수 있었던 것이다.

본고에서 우리는 과부직제를 보여주는 자료들을 가능한 많이 소개하고자 한다. 성경과 교부들의 글들, 그리고 교회규정집 등 초대교회의 문헌 자료들을 통해 활발하게 활동했던 여성들의 사역과 지위에 관해 살펴볼 것이다. 나아가 교회의 조직과 제도가 발전할수록 남성의 지도력이 중심적 위치를 차지하고, 과부의 역할들이 축소되고 그 지위와 상징이 왜곡되어 가는 것을 보여주고자 한다. 초대교회 여성들의 지위와 사역에 관한 학문적 연구가 다각도로 이루어지고 있는 가운데 여성성직제도인 과부에 대한 연구는 활발하게 활동했던 초대교회 여성사역에 대한 연구에 풍성함을 더할 것이다.

1) F. Brown et al., *Hebrew and English Lexicon to the Old Testament* (Oxford: Clarendon, 1957), 47.

2) Gustav Stählin, “chēra” *Theological Dictionary of the New Testament*. Vol. 9. Edited by Gerhard Kittel and Gerhard Friedrich ; translated by Geoffrey W. Bromiley (Grand Rapids, Mich. : W.B. Eerdmans, c1985), 440-442.

## II. 신약성서에 나타난 과부의 직제

신약성서에서 '과부'의 명칭이 교회의 직제로 처음 소개되고 있는 곳은 바울이 '참 과부'들을 선별하여 명부에 올리도록 권고한 디모데전서 5장이 다.<sup>3)</sup> 참 과부로 명부에 오를 수 있는 조건은 60세 이상의 높은 과부로서 한번 밖에 결혼하지 않은 자, 즉 재혼의 경험이 없는 자라야 하며(v.9), 무엇보다 그들을 부양하는 자가 없어야 한다(v.4, 16). 또한 인성과 경건의 조건이 검증된 사람이어야 한다(v.5, 10~13).<sup>4)</sup> 선별되어 명부에 등록된 과부가 되면 이들은 교회를 위해 기본적인 사역을 맡게 되고, 교회는 이들의 기본적인 생계를 책임진다. 명부에 오른다는 말을 나타내는 헬라어 *katalekein*은 특별한 목적으로 선발될 때 사용되는 전문용어로서 터툴리아누스는 이를 성직으로 인증된다는 의미로 번역하였다.<sup>5)</sup> 참 과부로 교회의 명부에 오른 과부는 단순히 남편이 없는 여성을 지칭하는 것, 낮은 소외계층으로 동정 받는 사회적 신분을 나타내는 것이 아니라 교회 내의 성무에 관여하는 고유한 직책을 의미하는 것이 되었다.

바울이 그 당시 참 과부의 조건으로 나이와 경제적 여건, 인성과 경건을 거론한 데는 몇 가지 이유가 있다. 먼저 경제적 이유를 보면, 이미 언급한 바와 같이 과부는 사회적으로 억압받는 약자로서 구제의 대상이라는 인식

3) 초기교회 공동체에서 과부들이 개별적으로 혹은 집단적으로 독신으로 헌신의 삶을 결단하면서 그리스도를 위해현장의 일꾼으로 활동한 흔적은 많다. 그들은 교회에서 나름대로 위상을 차지하며 영적 위력을 발휘하였다. 사도들의 후원자가 되기도 하고 가난한 자들을 먹이고 입히는 자선가로 혹은 가정교회의 지도자가 되기도 했다. Cf. 차정식, “가난한 성직의 한 내력” 『신학사상』(1999, 겨울). 137-146. 그러나 이들의 활동이 공적인 직제에 임명되거나 안수되어 활동한 표현은 없다. 그러므로 성직으로 과부를 거론한 것은 디모데 전서 5장이 처음이다.

4) D. R. MacDonald, *The Legend and the Apostle* (Philadelphia: Westminster Press, 1983), 74.

5) M. Dibelius & H. Conzelman, *The Pastoral Epistles*, tr. by P. Buttolph & Adela Yarbro (Philadelphia: Fortress, 1972), 75. 차정식, “가난한 성직”, 150에서 재 인용.

이 지배적이었으므로 이들을 향한 자선과 구제활동은 교회의 주된 임무중 하나였다. 예루살렘 교회에서 과부들에게 구제품을 전달하는 과정에서 히브리파 과부들과 헬라파 과부들 사이에 긴장이 표면화된 이야기만 보더라도 이를 잘 알 수 있다(사도행전 6장). 문제는 과부 외에도 고아나 나그네 등 교회가 구제해야 할 대상자의 수가 너무 많아 교회의 재정이 이를 감당하기 힘들어진 것이다.<sup>6)</sup> 그래서 바울은 손자나 손녀, 친척 등 친족들에게 과부에게 재정적 지원을 해야 할 우선적 책임을 주어 교회의 부담을 덜고자 했던 것이다(v.4, 16). 과부에게 부양할 가족이 아무도 없을 때, 이들을 등록된 과부의 명단에 올려 교회의 사역을 맡겼고, 교회는 이들의 생계를 책임졌던 것이다.

교회의 재정 문제보다 더 중요한 것은 종교적인 문제였다. 젊은 과부들이 독신의 삶을 살겠다는 맹약을 깨고 정욕으로 인해 믿음을 저버리는 일도 발생하였고(v.11-12) 여자들이 거짓된 가르침을 따라<sup>7)</sup> 집집마다 다니며 진리인양 전파하면서 성도들을 미혹하고 교회를 혼란케 하는 일도 종종 있었으며, 이로 인해 교회가 세상으로부터 비방을 듣기도 하였다(v.13-14). “쓸데없는 말” 혹은 “마땅히 아니할 말”로 번역되는 말들의 내용과 정체에 대해서 구체적으로 알 수는 없지만, 그 말들에 미혹된 자들에게 “사탄에게 돌아간 자들(v.14)”로 표현한 것으로 보아 그것은 영혼을 파멸시키는 거짓 교설일 것이다. 바울이 디모데서뿐 아니라 디도서와 같은 목회서신 전반에서 거짓 가르침을 언급한 정황을 볼 때, 거짓 가르침은 당시 교회의 심각한 문제였음에 틀림없다. “혼인을 금하고”, “어떤 음식물은 먹지 말라”고

6) 유세비우스의 기록에 의하면 기록에 의하면 3세기 중반 로마교회가 돌본 과부의 수만 천 오백명에 이르렀다고 한다 (*Ecclesiastical History* VI.43.11). Cf. P. Brown, *The Body and Society: Men, Women and Sexual Renunciation in Early Christianity* (New York: Columbia Univ. Press, 1988), 148.

7) 한글 개역개정 성경에는 “쓸데없는 말을 하며 일을 만들며 마땅히 아니할 말을 하나니...”라고 되어 있다.

가르치는 무리들(딤후4:3), “망령되고 허탄한 신화”를 말하는 무리들(딤후4:7), “망령되고 헛된 말과 거짓된 지식”을 전하는 무리(딤후6:20-21)들은 극단적 형태의 신앙에 빠져 가정과 사회를 어렵게 만드는 자들이었다. 이런 거짓 교설에 쉽게 미혹되고 흔들리는 부류 중에는 여성들이 특히 많았다(딤후3:6-7).<sup>8)</sup> 그래서 바울은 여성을 사역자로 세울 때, 이것을 특별히 고려하여 교회 내에서 경건과 덕망으로 존경받는 나이 많은 과부들로 이 직책에 임명하도록 권고했던 것이다.<sup>9)</sup>

조건에 합당하여 선별된 과부들에게 주어진 직무는 우선 기도와 간구(v.5)였다. 물론 기도와 간구는 모든 성도들이 해야 하는 것이었지만, 특별히 과부들은 밤낮으로 기도의 임무를 지니고 성도들과 교회를 위해 중보하며 계시를 받고 공동체를 유익하게 해야 했다. 포르테(Jean La Porte)의 연구에 의하면, 초대교회는 특별히 노인들에게 항상 금욕과 금식, 기도생활을 통해 관상(contemplation)의 삶에 이르도록 권유하였다. 이는 구약시대부터 하나님은 의지할 데 없는 가난한 자들의 기도를 특별히 들으시고 응답하신다는 믿음 때문이었다. 그래서 과부들에게 교회와 성도들을 위한 기도의 직무가 주어지는 것은 극히 자연스러운 일이었다.<sup>10)</sup> 터스톤(B. B. Thurston)은 초대교회 과부의 직무는 주방에 머물러 요리를 만들고 손님을 접대하는 사역이 아니라, 견고한 믿음과 정결한 삶으로 모범이 되며, 하나

8) 그들(이단들) 중에 남의 집에 가만히 들어가 어리석은 여자를 유인하는 자들이 있으니 그 여자는 죄를 중히 지고 여러 가지 욕심에 끌린바 되어 항상 배우나 끝내 진리의 지식에 이를 수 없느니라”(딤후3:6-7).

9) 바울의 이같은 의도로 씌어진 몇몇 구절들(ex. 딤후2:15; 딤후5: 14)이 남성 중심의 가부장적 교회가 여성들의 교회 리더십활동을 제한하기 위해 절대강령처럼 사용하여 왔지만 그것은 잘못된 해석이다. 이 구절은 성서 문맥적으로, 정황적으로 당시 에베소 교회의 문제를 야기시키는 특정 사건들과 연결하여 보아야 한다. 시공을 초월하는 그리스도의 절대 강령처럼 해석되어 여성에게 침묵을 강요하거나 여성지도력이 비 성서적이라고 보는 것은 가부장적 교회의 해석일 뿐이다.

10) Jean La Porte, “The Elderly in the Kife and Thought of the Early Church,” in *Ministry and the Aging*, ed. W. M. Clements (San Francisco: Harper & Row, 1981), 38.

님과 공동체를 잇는 중보의 사역이었음을 강조한다.<sup>11)</sup> 과부의 두 번째 직무는 구제와 선행이었다. 10절에 기술된 선행과 구제의 덕목은 참 과부가 되기 위한 조건들이기도 했지만, 이것은 참 과부의 명부에 오른 자들에게 주어진 사역으로 이어졌을 가능성이 크다.<sup>12)</sup> 과부들에게 주어진 세 번째 직무는 성도들의 각 가정을 방문하여 돌보는 심방이었다. 13절은 집집마다 다니며 심방을 할 때 덕스럽게 목양적 돌봄을 잘 수행하도록 권면하는 구절이다.<sup>13)</sup> 또한 과부들은 제한적이거나 가르치는 사역에도 참여한 것으로 보인다. 디도서 2장 4절의 “그들로 젊은 여자들을 교훈하되..”라는 구절을 참조한다면 과부들이 교회의 젊은 여자들을 가르치는 임무를 수행했을 가능성이 높다고 볼 수 있을 것이다.<sup>14)</sup>

디모데전서 5장은 에베소교회에서의 과부직제의 기원을 보여준다. 교회에는 젊은 과부와 늙은 과부, 재정적으로 자급자족이 가능한 과부와 절대적으로 빈궁한 과부, 가족이 있는 과부와 없는 과부 등 다양한 종류의 과부들이 있었다. 과부직제는 교회에서 여성들이 열정과 헌신을 공적으로 분출하는 통로가 되었으며, 과부들은 금욕을 동반한 기도와 간구, 선행과 구제의 성무(聖務)를 이행하며 공동체를 섬겼다. 앞에서 언급한 신앙에 열광적인 여성들이 필연적으로 이단들과 연루되는 것은 아니었을 것이다. 과도한 열정과 충성, 헌신이 교회에서 받아들여지지 않을 경우, 여성들은 제도권 교회 밖으로 나가 자기들끼리만의 공동체를 형성하여 열정을 분출하기도 했고<sup>15)</sup> 제도권 교회에 남아 교회가 제공한 직제를 통해 열정과 헌신을

11) B. B. Thurston, *The Widows: A Women's Ministry in the Early Church* (Minneapolis: Fortress, 1989), 69. Cf. C. H. Turner, “Ministries of Women in the Primitive Church” in *Constructive Quarterly* (1919), 439.

12) Cf. E. F. Scott, *The Pastoral Epistles* (New York: Harper & Bros., 1936).

13) M. Dibelius & H. Conzelmann, *The Pastoral Epistles*, 75.

14) 차정식, “가난한 성직의 한 내력,” 150.

15) 앞의 글, 149. 과부들이 제도권 교회와 차별화 하여 자신들만의 공동체를 형성하여 신앙 열정을 발휘하고 제도권 교회의 가부장적 성격을 풍자화 하여 스스로를 위안하고 자신

발휘하기도 했다.

### III. 속사도시대 과부직제

속사도시대는 제도적 교회가 움을 틔우는 중요한 시기였다. 사도들이 이미 세상을 떠난 상황에서 교회는 외부적으로는 로마제국의 박해와, 내부적으로는 영지주의와 마르시온주의, 몬타누스주의와 같은 종파들의 도전으로부터 교회와 성도들을 지켜야만 했다. 이를 위해 2세기 교회는 감독을 중심으로 계층적 직제(hierarchy)를 형성하면서 하나되는 교회, 소위 사도적 가르침을 수호하는 '정통(orthodoxy)' '공(Catholic)교회'로 제도적 틀을 갖추어 가기 시작하였다. 공교회의 계층적 직제(hierarchy)에 과부가 포함됨을 보여주는 속사도시대의 문헌들은 다음과 같다.

이그나티우스(Ignatius of Antioch, 105이전?~135)는 스미르나교회에 보내는 편지에서 감독과 장로, 그리고 집사와 주의 일에 협력하는 일꾼들에게 문안할 때, 과부를 포함시키고 있다(Smyr 13.1).<sup>16)</sup> 감독에서부터 직제 하나하나에 이르기까지 문안하는 맥락을 보면 '과부'도 스미르나교회의 성직이었음이 분명하다. 디모데전서 5장의 과부와 비교해 볼 때, 여기서 과부로 불리운 자들은 '처녀들'이었다. 스미르나교회는 한번도 결혼하지 않은 동정 여성들만 과부로 임명한 듯하다. 나이에 대한 특별한 언급이 없는 것으로 보아 바울이 제시한 나이의 기준은 각 교회의 상황에 따라 융통성 있게 적용된 것으로 보인다. 스미르나교회의 감독 폴리카르포스(polycarp of

들의 소외됨을 극복했을 가능성에 대해 채승희, "요한행전에 나타난 여성 금욕주의 공동체," 『한국교회사학회지』(2007, 4), 257-270을 참조하기 바란다.

16) W. R. Schoedel, *Ignatius of Antioch : A Commentary on the Letters of Ignatius of Antioch* (Philadelphia: Fortress, 1855), 247.

Smyrna, ?~169)에게 보내는 편지에서 “과부들을 도외시하지말라, 우리 주님 앞에서 감독으로서 너는 그들의 인도자가 되어야 한다. 모든 일을 너의 허락 하에 이루어지게 하고, 너 또한 하나님의 허락없이 아무것도 행해서 는 안된다”(Polycar. 4.1)고 하면서<sup>17)</sup> 이그나티우스는 감독하의 모든 직제들이 하나로 움직여야 하는 질서를 강조하고 있다. 이는 교회는 감독의 권위를 중심으로 계층적 직제가 이루어져야 한다는 그의 사상을 내포하는 것이기도 하다.

속사도시대 과부에 대한 자료는 폴리카르포스가 필라델피아교회에 보낸 서신에서도 나타난다. 편지의 4, 5, 6장은 차례로 과부와 집사, 동정, 장로 등의 직제들에 대한 조언을 담고 있다. 직제들을 다루는 장들과 나란히 있는 것에서 과부는 교회를 이끌어가는 성직이었음을 알 수 있다. 4장에서 서술하고 있는 과부의 직무와 품행은 디모데전서 5장에 나타나 있는 것과 거의 동일하게 바른 신앙과 덕스러움을 갖추도록 가르치고 기도의 사역을 강조하고 있다.

폴리카르포스의 서신에서 과부에 대해 가장 흥미로운 것은 과부의 직제를 ‘하나님의 제단(an altar of God)’에 비유한 것이다.<sup>18)</sup> 과부를 제단 자체에 비유한다면 이는 제사의 의미와 직결된다. 그리스도께서 자신을 제사로 드려 인류를 구원한 희생을 본받아 과부는 공동체를 위해 자신을 통째로 드리는 희생과 헌신의 역할모델이 되어야 한다는 의미일 것이다. 한편 과부들이 교회에 봉헌된 제물로 생계를 이어가기 때문에 제단 자체보다 제단에 올려진 헌물로 해석하기도 한다. 로마의 감독 클레멘스(Clement of Rome, ~96/97)는 교회에서 성직을 맡은 자들을 ‘대제사장에게 검열되기 위해 제단에 올려진 헌물’에 비유한 적이 있다.<sup>19)</sup> 이는 모든 성직자는 제단

17) Schoedel, *Ignatius of Antioch*, 269.

18) Polycarp, *To the Philippians* 4. ANF. Vol. 1 Ed. Alexander Roberts, & James Donaldson, (Massachusetts: Hendrickson, 1999), 34.



에 올려진 현물만큼 정결하고 성결해야 함을 의미한다. 어떠한 은밀한 죄도 하나님을 속일 수 없다.<sup>20)</sup> 그러므로 과부는 성결한 삶으로 제단에 올려진 현물처럼 흠이 없고 성결해야 한다.<sup>21)</sup> 폴리카르포스의 “하나님의 제단”의 비유를 통해 초대교회 공동체는 과부를 자신을 내어주는 희생과 거룩한 삶의 모델로 인식했음을 알 수 있다.

속사도시대의 묵시문헌인 *헤르마스의 「목자」*도 성직제인 과부의 존재를 분명히 드러내는 자료이다.<sup>22)</sup> *「목자」*의 두 번째 환상에서 헤르마스는 여인의 형상을 한 교회로부터 계시를 받는다. 이 여인(교회)은 헤르마스에게 한 권의 책을 주며 그것을 두 권으로 만들어 하나는 클레멘스에게 또 하나는 그라프테(*Grapte*)에게 전할 것을 명한다: “클레멘스는 사명을 따라 그 책을 다른 도시에 전할 것이며, 그라프테는 이것으로 과부와 고아들을 훈계하게 될 것이며, 너는 이 도시에서 교회를 이끌어가는 장로들에게 읽힐 것이다.”<sup>23)</sup> 이 부분은 2세기 제도적 교회의 직제가 형성되는 과정을 보여주는 중요한 부분으로 해석되는데, 교회를 이끌어갈 지도자들을 어떻게 세우는지, 그들에게 무엇을 가르쳐야 하는지를 보여주는 부분이다. 여인(교회)은 헤르마스를 통해 조직이 미비한 원시 그리스도 공동체가 제도적 체제를 갖추도록 돕는다. 여인이 전한 책은 장로와 과부, 고아를 가르치는 것으로 교회의 지도자들을 교육하는 책이다. 여인은 헤르마스에게 다른 도시의 교회들에도 이 책을 널리 퍼뜨려 읽게 하라고 명령한다.<sup>24)</sup> 이는 세상의 모든 교

19) 1 Clem. XXI.3.

20) 1 Clem. XLI.2.

21) Jean La Porte, *The Role of Women in Early Christianity* (Lewiston: Edwin Mellen, 1982), 60.

22) Leopold Zscharnack, *Der Dienst der Frau in den ersten Jahrhunderten der christlichen Kirche* (Göttingen: Vandenhoeck & Ruprecht, 1902), 105.

23) *헤르마스의 「목자」* II.4.3. C. Osiek, *Shepherd of Hermas: A Commentary* (Minneapolis: Fortress, 1999), 58.

24) 앞의 글.

회들이 교육을 통해 잘 세워지도록 하기 위함이었다. 이 책에 과부들이 교육을 받아야 하는 내용이 적혀있는 것으로 보아 2세기 교회가 제도적 교회로 모양을 갖추어가는 과정에서 과부가 간과할 수 없는 중요한 직제였다는 데 학자들은 동의하고 있다.<sup>25)</sup> 과부는 속사도시대에도 중요한 역할을 하고 있었으며, 그후로 발전해 나갈 교회의 제도에서도 없어서는 안 될 직제로 인식되었다.

속사도시대 문헌들에 나타나는 과부직제의 조건과 직무는 디모테전서에 나타난 과부의 그것과 큰 차이가 없다. 교회가 감독 중심의 제도적 교회로 발전해 가는 과정에서 과부의 직제는 - 교회의 어느 직분이든 마찬가지로 - 감독에게 철저히 순종해야 한다. 행동과 품성, 믿음에 있어 전체 교회 공동체의 모범이 되어야 하며, 이들을 중보해야 하는 직무가 더 엄격하게 표현되고 있다.

#### IV. 3세기 교회문헌들에 나타난 과부직제

북아프리카 카르타고의 교부 테르툴리아누스 (Tertullian ?160~?220)의 글에서 2세기 말, 3세기 초의 과부직제에 대한 정보를 얻을 수 있다. 『On Exhortation to Chastity』에서 테르툴리아누스는 당시 여성 성직자들이 많았음을 이야기하고 있다: “교회에 성직(Ecclesiastical Order)을 맡은 남종과 여종들이 얼마나 많은가? 그들은 모두 하나님의 신부로 살기를 소망하여 독신을 결단한 자들이다.”<sup>26)</sup> 그가 가르키는 많은 여자 성직자들 중 ‘과부’들이 있었고 그들은 제도적 교회로부터 합법적으로 검증 과정(특별히 순결

25) Osiek, *Shepherd of Hermas*, 58-59; Zscharnack, *Der Dienst der Frau*, 105.

26) Tertullian, *On Exhortation to Chastity* 13.

의 실천에 있어서)을 통과한 자들이다.<sup>27)</sup> 『To His Wife』에서 그는 과부성직의 조건으로 디모테전서 5장에서처럼 정숙한 품행을 설명하고, 특별히 ‘하나님의 제단’으로서 과부의 성결을 강조하였다.<sup>28)</sup>

『On the Veiling of Virgins』 9장에서 테르툴리아누스가 20세가 안 된 한 처녀를 ‘과부’의 자리에 임명한 어떤 소아시아 교회의 감독을 몹시 힐책하는 부분이 있다.<sup>29)</sup> 그 여인이 아무리 그리스도를 위해 헌신을 맹세한 동정이었다 하더라도 테르툴리아누스는 과부의 조건으로 바울이 제시한 나이 기준을 엄격히 지킬 것을 주장하였다.<sup>30)</sup> 나이 외에도 그는 바울이 디모테전서에서 열거한 과부의 조건들을 충족할 것을 권고하면서 “상담하며” “위로하고” 구제하는 일에 숙련된 여성으로서 회중들로부터 존경을 받아 “선출”되어야 함을 첨가하고 있다.<sup>31)</sup> 테르툴리아누스의 글에서 과부가 회중으로부터 선출되었으며, 기도와 선행, 구제의 역할과 더불어 상담과 위로의 목회 사역을 담당하고 있었음을 알 수 있다. 특별히 흥미로운 것은 테르툴리아누스가 그 처녀가 자신이 마치 과부인양 모든 여성들이 머리에 쓰는 두건조차 쓰지 않고, 과부들이 앉는 자리에 앉은 것을 언급하면서 이에 대해 분노하며, 질책하는 부분이다.<sup>32)</sup> 여기서 우리가 유추할 수 있는 것은 이 소아시아 교회는 예배시간에 과부들만이 앉는 특별석이 있었다는 사실이다. 그 자리는 모두에게 존경받도록 지정된 영예로운 자리였으며, 과부가 그 자리에 앉을 때는 두건을 쓰지 않았다.<sup>33)</sup> 그 자리가 평신도들과 구

27) 직제의 합법성의 중요성에 대하여 Cf. 앞의 글, 8.

28) Tertullian, *To His Wife* 7.

29) Tertullian, *On the Veiling of Virgins* IX.

30) 앞의 글. 테르툴리아누스가 나이기준을 엄격히 준수되기를 바라고 가르치지만 절대성을 가지는 것은 아니라고 한다. 교회 상황에 따라 감독이 피지 못하게 60세 이하 처녀를 과부로 임명할 경우가 있고 그럴 때는 누구에게도 흠잡힐 일이 없을 만큼 훈련시켜 과부의 성직을 받게 하라고 조언한다. 그러나 가능한 그런 경우는 피하는 것이 좋다고 말한다.

31) 앞의 글.

32) 앞의 글.

별되는 성직자의 자리라는 데 대부분의 학자들은 동의한다.<sup>34)</sup>

『On Modesty』에서는 과부가 더욱더 높은 위상의 직제임을 말해준다. 죄를 뉘우치고 참회할 때, 참회자들은 중앙에 서서 과부와 장로들 앞에서 엎드려 부복하고 머리에 재를 쓰며, 과부와 장로 앞에서 눈물로 호소하게 하였다.<sup>35)</sup> 이는 죄를 지은 자들이 회개할 때 치르는 참회의 절차였으며, 과부와 장로는 참회자들의 참회에 대한 증인의 역할을 한 것으로 보인다. 이는 사제의 역할로 부족함이 없는 중요한 사역으로서 이 역할을 맡은 과부의 지위와 위엄이 컸다는 것을 보여준다.

『On Exhortation to Chastity』와 『To His Wife』는 과부의 조건과 직무를 신약성경과 속사도 교부들이 강조한 내용을 따라 적고 있다. 한편 『On the Veiling of Virgins』와 『On Modesty』에서는 이전 문서들에서 볼 수 없었던 격양된 과부의 지위와 역할이 소개되고 있다. 과부는 일반 회중들과 떨어져 구별된 자리에서 두건을 쓰지 않고 앉았는데, 두건을 쓰지 않은 것은 과부는 단순한 여성이 아니라 性(성)을 초월한 하나님의 종으로 인식되었음을 말해 준다. 사역에 있어서도 금식과 기도, 선행과 구제의 돌봄 외에도 상담과 가르침으로, 참회 절차의 증인으로, 그리고 교회의 법적 권한을 실행하는 직무로 확대된 것으로 나타난다.

테르툴리아누스와 동시대 작품인 교회규정집 『사도전승, *Apostolic Tradition*(이하 AT로 표기)』<sup>36)</sup>과 3세기 초반의 시리아지역 교회의 규정집

33) 두건을 쓰지 않은 것은 여러 가지 해석이 가능하겠지만 본고에서는 지면상 생략하기로 한다. 단 두건은 초대교회가 여성이라는 성을 제2의 성, 열등한 성으로 폄하하는 사고에서 여성성을 가리는 의미로 사용되었으며 두건을 쓰지 않은 것은 과부나 동정은 그들이 수덕과 경건의 삶으로 이미 자신들의 여성성을 극복한 것으로 칭송받았기 때문이었을 것이다.

34) Gryson, *Ministry of Women* 21.

35) Tertullian, *On Modesty* 13.

36) *Egyptian Church Order* 라고도 불리기도 한다. 로마의 대립감독 히폴리투스(Hippolytus, ?189-235)의 작품으로 추정되지만 논란의 여지가 있다. 3세기 교회생활과 전례(Liturgy)에 대한 자료로 중요한 자료이다. Cf. P. F. Bradshaw, M. E. Johnson, L. E. Phillips, *The*

『거룩한 사도들의 가르침, *Didaschalia Apostolorum*(이하 *Didas.*로 표기)』<sup>37)</sup>은 과부에 대해 테르툴리아누스가 다룬 소아시아 교회의 상황과는 전혀 다른 양상을 보여주고 있다. 과부를 직제로 인정하지만 교회의 구제 대상으로서 기도의 직무 외에 특별히 강조하는 바가 없다. *AT*와 *Didas.*는 모두 성직 과부는 안수직이 아니라 지명되는 것임을 명시하면서 다른 직제들 중에서 차원이 낮다는 것을 강조하고 있다.<sup>38)</sup> 특히 *Didas.*는 과부 사역의 부정적인 면을 크게 부각시키면서 과부들은 집안에 머물며 기도하고 부지런히 옷감을 짜서 가난한 자들에게 나누어주라고 권고한다.<sup>39)</sup> 과부가 교회에서 가르치는 일은 합당하지 않고, 그리스도의 이름으로 가르치거나 세례를 행한다거나 하는 행동은 불경한 것이며, 말씀을 어기는 죄를 짓게 될 것이라고 경고한다.<sup>40)</sup> *Didas.*는 여성 세례자에 대한 교육을 집사의 사역으로 분류한다.<sup>41)</sup> *Didas.*는 과부의 지위와 역할을 집사의 역량 아래에 둔 첫 규정집이다. 과부의 모든 목회적 사역은 감독과 집사, 장로의 지시 하에 이루어지도록 하였다.<sup>42)</sup>

한편 *Didas.*는 과부를 ‘하나님의 제단’에 비유하고 있지만, 폴리카르푸스나 테르툴리아누스에서처럼 성결과 거룩의 의미로 과부를 제단에 비유하는 것이 아니라 오히려 제단이 성전 한 곳에 지정되어 있기 때문에 과부에 비유된다고 이야기한다: “하나님의 제단은 한 곳에 고정되어 있고 여기 저기 헤매고 돌아다니는 법이 없듯이, 과부들도 구걸하기 위해 신자들의 집을 드나들지 말고 가정에 머물러야 함을 알게하라.”<sup>43)</sup> 과부의 자리를 제한

---

*Apostolic Tradition: A Commentary* (Minneapolis: Fortress, 2002).

37) R. H. Connolly, *Didaschalia apostolorum* (Oxford: Clarendon Press, 1929).

38) Bradshaw, *The Apostolic Tradition* 10, 73; Connolly, *Didaschalia apostolorum* 14, 132.

39) *The Apostolic Tradition* 10; Connolly, *Didaschalia* 15, 138.

40) Connolly, *Didaschalia* 15, 132-3, 142.

41) 앞의 글, 16, 146.

42) 앞의 글, 15, 132-3, 142.

43) 앞의 글, 15, 133.

하고 행동을 삼가하라는 의미로 제단의 비유를 사용하면서 과부들은 한 곳에 머물러 기도에만 전념할 것을 권하고 있다: “하나님을 기쁘시게 하는 과부는 집에 머물며 밤낮으로 주님을 묵상하고 쉬지말고 정결한 마음으로 중보하는 것이다.”<sup>44)</sup>

*Didas.*의 여성사역을 제한하려는 표현들에 대해 메투엔(C. Methuen)은 시리아와 소아시아 지역 많은 교회에서 과부가 사제직과 나란히 거론될 만큼 지위가 있었고 활발하게 사역에 참여하고 있었다고 해석해야 한다고 주장한다. 실제로 과부의 직제를 받은 여성들은 교회에서 가르치기도 하고 세례를 베푸는 등 성례를 집례하기도 했다.<sup>45)</sup> 그런 일이 전혀 없었다면 굳이 규례집에서 이를 언급하고, 엄격히 금지하는 조항이 있을 이유가 없었을 것이다. 아무튼 이유가 어떠한지 *Didas.*의 저자는 지금껏 여성평화적 성향으로 과부의 지위를 낮추고 활동을 제한하고자 하는 의도를 가지고 있었던 것은 분명하다.<sup>46)</sup>

알렉산드리아 지역 교회에서는 과부의 위상과 역할이 안정되어 있는 것으로 나타난다. 클레멘스(Clement of Alexandrian, 150~215)는 감독과 장로, 집사, 과부와 같은 직분자들을 ‘택한 백성(chosen people)’이라고 불렀다.<sup>47)</sup> 오리게네스(Origen, 185~254)는 교회 직제에 든 자들, 감독과 장로, 집사와 과부의 조건으로 성적 순결을 크게 강조하였다.<sup>48)</sup> 오리게네스는 특별히 과부를 사제직의 반열로 여겼다. 오리게네스는 디모데서에 나오는 과부가 갖추어야 할 덕목들 중, “성도의 발을 씻으며”(v.10)의 부분을 문자적으로 보

44) 앞의 글, 15, 139.

45) C. Methuen, “Widows, Bishops and the Struggle for Authority in the *Didascalia Apostolorum*” *JEH* 46 (1995), 197, 201.

46) 앞의 글, 199-200.

47) Clement of Alexandria, *Pedagogue* 3.

48) Origen, *Homilies on Luke* 17, *Griechischen christlichen Schriftsteller* (Leipzig: J. C. Hinrichs, 1936-1970), 49, 110.

기보다는 영적으로 해석해야 한다고 했다.<sup>49)</sup> 요한복음에서 예수께서 제자들의 발을 씻긴 의미는 그들의 영혼을 정결케 한다는 상징적 의미가 있는데, 마찬가지로 과부가 젊은 여성들의 발을 씻기는 것은 그들의 영혼을 맑게 하는 영적 가르침의 사역으로 해석해야 하며, 따라서 과부들은 교회에서 마땅히 존경받아야 한다고 말했다.<sup>50)</sup> 오리게네스의 글에서 알렉산드리아 지역의 교회들은 과부의 가르치는 사역을 합법적으로 인정하고 있었으며, 오리게네스는 그 가르치는 사역에 영적 의미를 더하였던 것이다. 알렉산드리아 지역의 교회들에서 과부의 지위와 역량이 높게 평가되고 있었음은 분명하다.

## V. 4세기 이후 문헌에 나타난 과부의 직제: 지위의 축소와 제한

4세기에 교회는 제도적으로 안정기에 들어갔으며, 따라서 이전 시기보다 다양한 지역에서 각각의 교회 법령들이 많이 쏟아져 나왔다. 이 시기는 여성들이 제도적 교회로부터 그 지위와 활동영역에서 점점 배제되어 가는 흔적이 두드러지게 나타난다. 『사도적 교회규범』으로 불리는 『*The Constitutiones Ecclesiasticae Apostolorum* (이하 CEA 라고 함)』은 교회의 기초는 직제라고

49) 오리게네스는 세가지 형태의 성서해석법을 제시했다. 첫째는 성서의 신체적(*somatic*) 해석으로 누구나 이해할 수 있는 성서의 자의적 의미의 해석이다. 둘째는 성서의 혼적(*psychic*)해석, 즉 도덕적 의미의 해석이다. 도덕적 해석은 성서안의 계명들과 문자적 규정들을 넘어서 공동체 설교에서 가르치는 신앙생활에 관한 구체적인 행동지침을 끌어내게 된다. 셋째는 성서의 영적(*pneumatic*)의미로 정신적, 신비적 해석방법이다. 그는 특히 영적 해석을 강조했는데 이 영적 해석을 위해서는 알레고리적 해석 방법(유형론도 포함) 사용되어야한다 (*de prin.* 4.1.11). 이것은 완전한 사람만이 이해할 수 있는 의미이다.

50) Origen, *Commentary on John* 6, 3 GCS 33, 273.

소개하면서 감독과 장로, 집사, 교사, 그리고 과부 등 각 직제에 대한 규정을 순서에 따라 기록하고 있다. 각 직제마다 특성이 있는데, 감독은 위엄(dignity), 장로는 인장(seal), 집사는 도움(helping), 교사는 지혜(wisdom), 그리고 과부는 책망함이 없음(blamelessness)이라고 하였다.<sup>51)</sup> CEA는 과부를 3명 임명하라고 적고 있는데, 두 명은 기도하고 계시를 받으며, 마지막 한 사람은 환자를 돕기 위함이었다.<sup>52)</sup> *Didas.*가 심방이나 환자를 돌보는 일을 여성 집사에게 맡긴 것과 비교하면 CEA는 *Didas.*보다 과부의 목회사역을 좀 더 넓게 허용하고 있다. 그러나 과부의 성찬집례는 강하게 반대하고 있다.

안드레가 말하기를 “형제들이여, 여성들을 위한 사역자들을 세웠더라면 좋았을 것 같습니다.” “우리가 받은 명령과 지시를 다 전해주면 되지요”라고 베드로가 말했다. 그러자 요한이 말하기를 “형제여, 우리 주님이 마지막 날 떡과 잔을 가져오라 하고 축사하시고...여자들을 우리와 함께 서게 하지 못하게 한 것을 잊으셨습니까?”...게바가 말하기를, “...여자들이 성찬자리에 함께 서 기도 하는 것은 적절치 않음을 기억합니다...대신 여자들을 성찬 때 바닥에 앉도록 해야 합니다...” 야고보가 이르기를 도움이 필요한 여성들을 위해 불철주야 기도하는 것 외 여자들에게 규정할 사역이 무엇이 있겠습니까?<sup>53)</sup>

CEA는 여성 사역자는 성찬집례로부터 모두 배척한다. 그러나 *Didas.*에서도 언급했듯이 초대교회 규정집들이 여성의 사역을 강하게 반대하고 나설수록 이 책들이 기록되고 통용되던 시기와 지역에서는 이 규정집들이 꺼리는 사역들을 여성들이 직접 행하고 있었을 가능성이 훨씬 높다. 당연히 3세기 말에서 4세기에 여성들의 사역을 저지하려는 세력과 이를 지지하고

51) CEA 1. Tr. by J. P. Aremdzen, “An Entire Syriac Text of the Apostolic Church Order,” JTS (1902), 61

52) CEA 21. Aremdzen, “Apostolic Church Order”, 71.

53) CEA 24. Aremdzen, “Apostolic Church Order”, 71.



여성들의 사역의 권리를 주창하는 세력의 갈등이 고조되었을 것으로 추정된다.<sup>54)</sup>

소아시아의 유명한 『라오디케이아 법령』에서도 그러한 갈등을 엿볼 수 있다. 법령 11: “연장자 여성(*senior women, presbytides*)을 교회의 직제로 세울 수 없다.”<sup>55)</sup> 법령 44: “여성은 성전(*sanctuary*)<sup>56)</sup>에 들어올 수 없다.”<sup>57)</sup> 『라오디케이아 법령』이 여러 규정집들 중에서 여성 성직에 대한 가장 강력한 거부를 표현한 것만은 분명하다. 여성을 직제에서 배제시키려 하고 성전에서 멀어지게 하려는 이러한 법령들의 목적은 교회 성직과 행정에 열광적으로 관여하는 여성들을 자제시키고 교회의 여성 리더십을 근절하기 위함이었다. 라폰테인(P. H. Lafontaine)은 법령 11의 ‘직제로 세울 수 없다’는 것도 안수하는 직제로 세울 수 없다는 뜻일 뿐 여성을 성직에서 완전히 제외한다는 의미는 아니라고 하였다. 법령 44도 이 법령이 교회에서 여성 리더십 전체를 배척함을 목적으로 하는 것이 아니라, 다만 예배나 성례의 집례와 같은 높은 사제직무로부터만 격리시키려는 것이며, 이는 다른 법령들에서도 종종 찾아 볼 수 있다고 하였다. 라폰테인은 『라오디케이아 법령』이 여성의 사제직만 반대하였으며, 여전히 기도와 중보, 환자를 돌보는 것과 같은 직무는 인정했다고 보았다.<sup>58)</sup> 그러나 라오디케이아 법령 어디에도 과부의 직제와

54) 여성직제는 있었지만 실제적 사역은 활성화되지 않았을 것으로 보는 학자는 G. Huls, “Dienst der vrouw in de Kerk. Een onderzoek naar de plaats der vrouw in een presbyteriale Kerkorde” (doctoral diss, Utrecht, Wageningen, 1951), 67. 실제적으로 사역이 활발했던 교회들이 있었다고 보는 학자는 C. Robinson, *The Ministry of Deaconess*, (London, 1898)192-193; J. Danielou, *The Ministry of Women in the Early Church*, tr. Glyn Simon (London: The Faith Press, 1974).

55) *Canons of Laodicea* 11. F. Lauchert, ed., *Die Kanones der wichtigsten altkirchlichen Concilien nebst den apostolischen Kanones* (Frankfurt: Minerva, 1961), 73.

56) 어떤 곳에는 제단으로 포기되기도 한다. “여성을 제단에 근접하지 못하게 하라.”

57) *Canons of Laodicea* 44, 77.

58) P. H. Lafontain, *Les conditions positives de l'accession aux ordres dans la première législation ecclésiastique* (300-492), ([S.l.]: Univ d'Ottawa, 1963), 39, 146.

직무, 아니면 적어도 여성집사와 같은 직제와 직무에 대한 항목이 없음을 볼 때 라폰테인의 해석은 설득력이 약하다고 할 수 있다. 라오디케이아 법령은 큰 역할이든 작은 역할이든 교회로부터 여성리더십의 철저한 배척을 목적으로 하고 있다.

4세기 말, 5세기 초 시리아에서 작성되었을 것으로 추정되는 『사도규정, *Apostolic Constitutions* (이하 AC 라 함)』은 가장 방대한 양을 가진 초기 교회의 규정집으로 알려져 있다. AC 8권은 교회의 직제를 세우는 과정과 방법을 설명하고 있다. 과부는 안수직이 아니라는 것과<sup>59)</sup> 이전의 어떤 규정집보다 과부의 정절서약을 강조하고 있으며<sup>60)</sup> 여성의 세례집례를 엄격히 금지시키고 있다.<sup>61)</sup> 한편 교리나 신앙에 관한 질문들을 가볍게 다루어서는 안된다고 주의를 주고 있지만, *Didas.*처럼 완전히 금하지는 않고 있다.<sup>62)</sup> 안나(눅2:36-38)와 유딧(유딧9:1)을 디모테전서에서 바울이 말하는 ‘참 과부’의 모델로 들면서 과부의 가장 중요한 임무는 끊임없는 기도라고 적고 있다. 과부는 또한 그 행실과 덕, 그리고 믿음과 경건의 본이 되어야 하며, 과부는 하나님께 신성하게 바쳐진 자들의 대표로서 성결해야 한다고 가르친다.<sup>63)</sup> AC는 과부를 예전 집례로부터 격리시키고 있지만, 성결과 금욕의 이미지를 부각하여 존경을 표하고 있다. 테르툴리아누스의 글에서 본 것처럼 집례를 위한 과부들의 지정석까지는 아니라 하더라도 과부를 모든 일반 성도들의 맨 앞에 자리하도록 하여 공동체의 모범자임을 나타내 보이고 있다.<sup>64)</sup>

AC는 여성들의 사제직에 대해 창세기와 바울서신을 이용하여 반대하고

59) 앞의 글, VIII. 2-28.

60) 앞의 글, III. 1.

61) 앞의 글, III. 9.

62) 앞의 글.

63) 앞의 글, III. 3; 5, 9.

64) 앞의 글, II. 57.

있다. 여성은 창조의 때부터 본질적으로 남성에 비해 열등하기 때문에 남성에게 순종해야 하는 존재이며, 따라서 제사와 안수, 축도와 같은 사제의 직무는 열등한 여성에게 위임될 수 없다.<sup>65)</sup> 과부를 하나님의 제단에 비유하고 있지만, 그 무게와 의미는 *Didas* 처럼 격하시키고 있다: "...하나님의 제단은 돌아다니는 것이 아니라 한 장소에 고정되어 있다...과부는 돌아다니지 않으며 ...배회하는 자가 되지 않도록 하라."<sup>66)</sup> AC를 4세기 말의 작품이라고 볼 때, 과부직의 축소는 당연하다. 4세기 교회가 안정적으로 제국교회로 발전하는 구조 속에서 교회의 여성리더십을 축소시키려는 의도는 당연한 것이다. 교회는 로마제국의 공화정 구조를 교회의 조직의 모델로 삼고 이를 활용하였다. 남성의 엘리트 리더십을 중심으로 조직교회가 세워지면서 예언적 능력과 카리스마적 힘에 의존하던 리더십이 점점 힘을 잃기 시작하였고 여성리더십도 함께 밀려나게 되었다.<sup>67)</sup> AC의 직제에 대한 규정은 제국교회가 나아가는 방향에 지극히 부합하는 것이다.

5세기 중반에 여성의 역할이 축소되던 지금까지의 흐름과 대조적인 규정집이 발간되어 흥미를 끈다. 이집트에서 시작되어 소아시아와 시리아 지역으로 퍼져 통용된 것으로 보이는 『우리 주 예수 그리스도의 증언, *Testamentum Domini Nostri Jesu christi* (이하 TD 라 함)』이 바로 그것이다. TD는 4개의 긴 장을 과부직제에 할애하며 그 영향력을 설명하고 있다.<sup>68)</sup> TD는 과부직제는 피택된 자에게 안수하여 세운다고 적고 있다.<sup>69)</sup> TD는 감독과 장로, 집사 등 교회의 모든 직제는 성도들로부터 선출되고 안

65) 앞의 글, III, 9. 여기서 인용한 성경은 고전 11:3; 창2:21; 창3:16 등이다.

66) *The Apostolic Constitution* III. 6.

67) Hamilton Hess, "Changing Forms of Ministry in the Early Church," in *Sexism and Church Law*. Ed. J. A. Corriden (New York: Paulist Press, 1977), 55.

68) Gryson, *The Ministry of Women*, 64-69. *Testamentum Domini Nostri Jesu Christi. Nunc primum edidit, latine reddidit et illustravit Ignatius Ephraem II Rahmani* (Hildesheim: G. Olms, 1968; reprint of the 1899 edition)

69) *Testamentum Domini* I, 40. Rahmani, 94-95.

수를 통하여 세워져야 한다고 명시하고 있다. 과부를 안수할 때 사용하는 기도문과 선포는 장로와 집사를 안수할 때와 동일하다.<sup>70)</sup> 과부로 선출되기 위한 조건으로는 그리스도인의 덕목(겸손, 성결, 경건, 완전..등)을 갖추고 수덕적 삶과 밤낮으로 간구하는 기도의 삶이 강조된다.<sup>71)</sup> 디모데전서의 참 과부의 조건을 충족할 것을 강조하면서도 나이의 기준에 대한 언급은 없다.<sup>72)</sup>

앞에서 테르툴리아누스의 글과 AC에서 나타난 과부들만의 지정석 전통이 TD 전통에 다시 나타난다: “앞줄에 앉게 되는 열 세 명의 과부....”<sup>73)</sup> TD에서는 과부를 칭할 때 단순히 과부라 하지 않고 ‘앞줄에 앉게 되는 과부’라고 수식을 붙여서 사용된 것이 여섯 번이나 나타나는데, 이는 과부성직을 특별히 고려하는 의도가 분명하다.<sup>74)</sup> 성찬이 있을 때 성찬이 차려진 단을 휘장으로 가리고 감독과 과부를 포함한 사제들은 휘장 안에 서게 된다. 감독이 중앙에 서면 그를 중심으로 우편과 좌편에 장로들이 나누어 서고, 장로 뒤 우편에는 집사가 좌편에는 과부가 서게 된다. 그 뒤로 독서자들과 부집사들이 서게 된다. 이들은 차례로 필요에 따라 예배를 도왔다.<sup>75)</sup> 과부는 또한 여성들을 가르치고 훈육하는 일을 맡았으며, 특히 여성집사의 자격을 심사하여 선별하기도 하였으며, 특별히 여성이 세례 받을 때 안수하는 직무를 맡았다.<sup>76)</sup> TD에서 보여지는 과부의 지위와 역할은 여성도들에게 감독의 역할을 하는 자들이었다. 다른 어느 교회자료도 이보다 과부의 성직을 높은 계열에 둔 바는 없으며, 영예롭게 존경을 표하지 않았다.

---

70) Gryson, 66.

71) *Testamentum Domini* I, 23; 42. *Rahmani*, 46-47; 100-101.

72) 앞의 글, I, 40. *Rahmani*, 94-95.

73) 앞의 글, I, 34. *Rahmani*, 82-83. Cf. Gryson, 65.

74) 앞의 글, I, 19; 2, 4; 8, 12; 34, 4; 41, 1; 43, 2.

75) 앞의 글, I, 34. *Rahmani*, 36-37.

76) 앞의 글, II, 4-8. *Rahmani*, 218-131.

TD는 과부의 초대교회 여성리더십 전체를 고려할 때도 제도적 교회 규정집에서 여성을 가장 높이 평가하고 인정하는 문헌이 된다.

## VI. 과부직제를 통해 본 여성리더십의 활동과 지도력 축소

원시기독교 공동체가 시작될 때부터 과부는 성직의 개념으로 존재했으며, 이 직제로 등록된 자들은 기도의 직무에 헌신하였고 성결과 경건의 삶으로 공동체의 모범이 되었다. 개 교회의 특성에 따라 직제의 조건이 다소 차이가 있었고 직무에 있어서도 심방과 상담, 가르침과 성찬 집례와 세례식에 참여하기도 하는 등의 차이가 나타났다. 지역에 따라 차이가 나타나는 것은 지역 교회의 특성이 반영되는 것이므로 당연하게 여겨질 수 있지만, 본고는 교회가 시간이 지남에 따라 조직을 갖춘 제도적 교회로 발전할수록 과부의 지위와 활동을 의도적으로 축소시켜왔음을 보고자 한다.

속사도시대에 과부는 이미 보편화된 직제로 인식되었다. 이그나티우스나 폴리카르푸스는 바울이 디모데에게 지침을 준 교회 지도자의 명부에 등록된 과부들의 자격과 역할들을 반복하여 강조하고 교회를 섬기도록 하는데 초점을 두었다. 그들은 공동체를 위한 과부의 중보기도의 직무를 강조하였고, 과부들은 가난한자와 환자들, 그리고 노약자들을 심방하고 위로하게 했다. *헤르마스의 「목자」*에서 교회직분자를 위한 지침서가 과부와 고아에게도 전해져 읽혀져야 함을 강조하는 것만 보아도 과부들은 초대교회 공동체가 제도적 교회로 발돋움하는 과정에서 빠질 수 없는 직제였고 그 역할이 중요했음을 알 수 있다. 가부장적 문화 코드에서 과부나 여성에게 큰 역할을 부여하지는 않았지만 적어도 속사도시대 문헌에서는 의도적으로 교회가 과부의 직제를 폄하하거나 그 활동을 제한하지는 않았다.

3~4세기는 교회가 한층 제도적 체계를 갖추게 된 때였다. 이 시기 문헌들에서는 여성을 폄하한다든지 교회에서 여성들의 역할을 축소시키려는 의도들이 노골적으로 드러난다. 속사도시대에서 3~4세기 제도적 교회의 완성으로 가는 과도기에 테르툴리아누스의 역할은 크다. 그는 로마제국의 엘리트로서 교회를 로마제국의 정치체(body politic)로 보고 제국의 정치체를 교회의 제도에 응용한 대표적 인물 중 하나였다. 군주통치의 개념을 삼위일체 하나님과 인간의 관계에 적용하여 설명하였고, 또한 감독과 직제의 계층(hierarchy)을 설명하는 데도 적용하였다.<sup>77)</sup> 당연히 그의 사고로는 교회의 여성리더십을 인정할 수 없었다. 그래서 그는 그 시기 대표적인 여성 혐오적 교부중의 하나로 통한다. 그러나 그의 글에서 우리는 과부가 예전과 교육의 직무를 행하는 높은 위상과 존경을 받았던 아시아의 어떤 교회에 대한 정보를 얻을 수 있다. 테르툴리아누스 자신이 여성에 대한 어떠한 신념을 가졌는가와는 상관없이 그의 글은 초대교회와 과부직제를 연구할 수 있는 중요한 자료이다. 여성에 대한 인식이 낮은 사회 속에서 일부 교회들은 여성에게 사역의 자리를 할애했으며, 과부들은 일정 영역에서 혹은 그 이상으로 역량을 보이며 활동하였다.

3세기 후반부터 교회에서 여성리더십은 심하게 축소된다. 이 시기의 교회규정집들은 직제에 대해 제법 상세하게 기술하고 있는데, 과부의 역할에 있어서 예전집례와 가르치는 일, 심방 등의 목회 사역을 엄격히 금지하는 항목들을 포함하고 과부를 감독하는 상위 직제의 역할을 강조함으로써 과부의 지위와 사역을 제한시키고 있다. 기도와 수덕적 영성이 교회 리더십의 기준이 되던 시기에서 과부들의 기도와 금식, 중보의 직무는 크게 존경받았지만, 기구화되어 가는 교회에서 더 이상 그들의 삶과 영성은 영향력을 발휘하지 못하게 되었다. 과부의 영성보다는 행정과 제반 사업들을 돌

77) A. Beck, *Römisches Recht bei Tertullian und Cyprian* (Halle: Max Niemeyer, 1930), 39f.

보는 집사의 직무가 더 크게 부각되기 시작한 것도 이 시기라고 할 수 있다.<sup>78)</sup>

3세기 중반 이후부터 4세기의 교회규정집들이 하나같이 과부들에게 ‘안수하게 해서는 안된다’, ‘가르치게 해서는 안된다’ ‘기도에 전념하게 하라’고 하면서 그 역할을 축소시키려 하지만, 이런 법령들을 역으로 해석하면 그 당시 교회의 여성들에 대한 다른 측면을 볼 수 있는 단서가 된다. 실제로 과부들은 안수를 행했고, 가르쳤으며, 테르툴리아누스의 글들에서 보여지듯이 성찬집례에도 계속적으로 참여했으며, 기타의 목회사역에도 적극적으로이었을 것이다. *CEA*, *Didas. AC* 혹은 *라오디케이아 법령* 같은 3~4세기 규례집들이 반복하여 과부들의 사제활동과 목회적 사역을 금해야 한다고 강하게 규정하는 것은 수 세기를 거치면서도 여성의 교회사역이 근절된 적이 없다는 것을 의미한다. 비록 이들의 사역이 국부적일 수 있고 간헐적일 수 있지만 결론적으로는 지속되었다. 그 증거는 *TD*가 잘 보여 주고 있다. *TD*는 5세기 까지 교회가 과부의 집례와 가르침의 역할을 허락하고 있었으며, 그들의 위상을 높이 평가하고 있었음을 보여주는 규례집이다. 유일하게 과부도 안수를 통해 세우는 직제임을 명시하고 있고, 그들의 직무는 기도와 심방 외에 예전과 가르침을 포함한다는 것도 보여주고 있다.

과부직제의 권한을 제한하고 역할을 축소하려는 의도는 그들을 지칭하는 ‘하나님의 제단’의 비유에 대한 이해와 해석을 통해서도 알 수 있다. 과부가 ‘하나님의 제단’으로 비유된 것은 폴리카르푸스의 편지에서 처음 등장했다.<sup>79)</sup> A.D. 70년 이후 성전이 무너진 후 회당은 성전을 대신했다. 회당에서 선창하는 자들은 과거 성전의 제사장의 역할을 하였고, 제단을 통

78) (여)집사직에 대해 본고는 지면상 논하지 않았다. 집사직이 급부상하고 상대적으로 과부직이 소외되는 현상이 3세기 후반부터 생긴다. 문서적으로는 *Didaschalia*에서 이 현상이 처음으로 두드러지게 나타나고 한 세기 뒤 『사도규정』에서 확연히 나타난다. See Thurston, *The Widow*, 96-105.

79) Poycarp, *To Philii*, 4. 위의 각주 16번 참조.

한 제사는 기도가 대신했다.<sup>80)</sup> 제사를 입술의 열매로 표현(히13:15)하거나 성찬과 기도를 제사로<sup>81)</sup> 표현하는 것들은 성전시대가 끝난 이후 변화된 제사의 인식들에서 기인한 것이다. 알렉산드리아의 클레멘스도 “제단은 ... 기도로 자신들을 헌신하는 회중”<sup>82)</sup>을 뜻한다고 했으며, 오리게네스도 “선한 사람의 영은 마치 선한 양심으로 기도와 향을 올리는 제단과도 같다”고 했다. 토마스(W. E. Thomas)는 초대교회에서 기도의 사역이 제사의 사역에 해당하는 만큼 기도를 주된 직무로 하는 과부의 지위와 사역의 무게는 컸다고 말한다. 그는 과부는 그들의 삶과 사역 자체가 ‘산 제사(living sacrifice, 롬12:1)로 공적 예배의 본질이었으며 중심이었다고 본다.<sup>83)</sup> 이런 의미에서 신약시대의 ‘제단’은 구약시대의 제사의 연장으로 보아야 한다. 제단은 제사의 자리이므로 과부의 기도사역은 새로운 의미의 제사였다. 폴리카르푸스가 과부를 제단에 비유한 것은 과부의 사역은 희생과 헌신, 성결과 거룩으로 공동체를 섬기는 본이 되어야 하는 자리임을 강조한 것이다.

테르툴리아누스도 다르지 않다. 『To His Wife』에서 그는 과부에게 제단의 비유를 사용할 때 “너무나 당연하게도 하나님의 제단은 성결해야 하기 때문이다.”<sup>84)</sup>라고 하면서, 과부가 되기 위해 얼마나 자신을 성결히 준비하여 타의 모범이 되어야 하는지를 강조하였다. 또한 제단은 하나님께 드려지는 모든 헌물이 놓이는 자리로서 온전한 헌신의 의미도 있지만, 쉬지 않고 간구하여 공동체를 하나님께 중보하는 자리임을 말하고 있다. 폴리카르푸스와 테르툴리아누스 때까지 과부직제를 하나님의 제단에 비유함에 있

80) T. H. Gaster, “Sacrifices and Offerings,” *Interpreter's Dictionary of the Bible* 4: 147, 159.

81) *Didache* 9; 10. K. Niederwimmer, *The Didache* (Minneapolis: Fortress Pres, 1998), 144, 155.

82) Clement of Alexandria, *The Stromata* VII. 6 in ANF 2. 531. Origen, *Against Celsus* VIII. 17.

83) W. F. Thomas, “The Place of Women in the Church at Philippi,” *Expository Times* 83 (1972), 120.

84) Tertullian, *To His Wife* 1, 7.



어 공통적으로 보여지는 것은 그들의 헌신과 중보, 금식을 동반한 기도를 통해 공동체를 세워가는 사명, 그리고 제단이 주는 성결의 의미만큼 그들의 삶 자체도 모든 부정한 것으로부터 떨어진 흠없는 삶으로 모범이 되는 것이었다.

제단에 대한 비유는 3세기 후반부터 4세기에 이르러 그 의미가 심하게 왜곡되었다. 제단의 비유는 순전히 과부의 열정적이고 활발한 사역을 제한하기 위해 사용되었다. 한 자리에서 움직이지 않는 부동성을 제단의 특성이라 하고 이를 과부에게 적용하였으며, 그들의 활동을 제한하였다.<sup>85)</sup> 여성들은 오직 집안에 머물러야 하며 밖을 나와 돌아다니는 일을 삼가 해야 한다고 가르치고 있다. 과부들이 심방을 다닌다든지, 교회에서 안수를 하거나 가르치는 등의 활동은 더 이상 제단 답지 못한 행동이 된 것이다. 제단의 비유는 오직 수동적이고 가려진 곳(집안)에서 기도로 중보하는 일에 전념해야 하는 이유가 되었다.

4세기의 제단에 대한 비유에서 더욱 두드러지는 것은 이 비유에 조금씩 변화를 주면서 여러 직위에 사용하여 과부직제의 격을 낮추고 있다는 것이다. AC는 '하나님의 제단'의 이미지를 과부 외에 동정들을 표현할 때도 사용하고 있는데, 과부를 '번제의 제단(altar of burnt offering)'으로 동정들을 '향로의 제단(altar of incense)'으로 비유했다.<sup>86)</sup> 캐롤린 오섹(C. Osiek)은 이는 과부직을 동정보다 아래에 두고 과부에게 주어진 의미를 다른 직제와 나누어 그 중요성을 희석시키려는 의도라고 했다.<sup>87)</sup> AC의 동정과 과부의 제단 비유는 메토디오스(?216~312 Methodius)의 비유를 참조한 것으로 보인다. 메토디오스는 과부를 동(銅)제단으로, 동정들을 금(金)제단으로 표현

85) Connolly, *Didaschalia apostolorum* 15, 133; *The Apostolic Constitution* III. 6.

86) *The Apostolic Constitution* II. 26.

87) C. Oiek, "The Widow as Altar: The Rise and Fall of a Symbol" *Second Century* (1983), 166-167.

했다. 동제단은 거기에 올려지는 헌물에 비중을 두는 것이며, 금(金)제단으로 비유했을 때 금은 완전한 성결을 의미하고 완전한 자들의 기도는 하나님 보좌에 이르는 향료와 같다고 하였다. 메토디우스는 금과 동의 질적 차이를 동정과 과부의 직제 해석에 사용하였다.<sup>88)</sup> AC는 메테디우스가 사용한 제단의 분류를 참고함으로써 과부직의 활동을 제한시켰다. 더 이상 성결하고 거룩한 제단의 상징은 과부의 것이 아니었다. 하나님께서 들으시는 성결한 자들의 기도의 직무도 동정들에게 돌아가게 함으로써 과부직제의 중요성을 심각하게 격하시켰다.

3세기 후반부터 제도권 교회에서 과부들의 활동을 제한시키는 의도가 강력하였음에도 불구하고 과부들의 사역이 전적으로 등한시 되지는 않았다. 조직화된 리더십보다 카리스마적인 리더십을 더 원하는 교회나, 혹은 제도권 교회의 의도적 억압에 반감을 가진 여성들과 이를 지지하는 교회들은 과부들의 기도와 성결하고 헌신적인 삶을 여전히 교회의 모범으로 삼고 추앙하였다. TD 전통은 과부가 사제급 성직이었으며, 집사보다 중요하고 높은 지위임을 인정하여 신약시대나 속사도시대 혹은 테르툴리아누스 때의 과부의 사역을 중요하게 받아들이고 인정하던 교회의 전통이 5세기까지도 간헐적으로나마 지속되고 있었다는 것을 말해준다. 하나님의 제단으로 비유되었던 과부의 직제는 이러한 교회들에게 있어서는 불철주야 기도로, 그리고 경선한 삶으로 힘과 영향력을 가지고 있었다.

---

88) 앞의 글, 167.

## VII. 나가는 말

초대교회 여성의 지위와 역할에 대한 연구가 활발해지고 있는 가운데 본고는 성직 과부에 초점을 두었다. 먼저, 과부가 여성의 결혼상태와 결부된 사회적 개념을 넘어 교회의 직제들 중 하나였고, 이를 통해 여성들이 교회 사역에 활발하게 동참하였음을 살펴보았으며, 이어서 가부장적인 제도권 교회에서 차츰 과부들의 지위와 열성적인 역할이 축소되어 갔음을 살펴보았다. 과부가 직제임을 보여주는 증거들을 성경에서부터 초대교회 문서들까지 지면이 허락하는 한 많은 자료를 제시하려고 노력하였다.

우선 성경 자료로 디모데전서 5장의 '등록된' '참 과부'가 과부직제를 처음으로 설명하고 있는 것으로 보았다. 이어서 속사도시대 문헌으로 이그나티우스의 서신, 폴리카르푸스의 서신, 그리고 *헤르마스의 「목자」*를 통해 제도적 교회로 발돋움하는 과정에서 과부가 빼놓을 수 없는 교회의 직제 중의 하나였음을 살펴보았다. 라틴교부 테르툴리아누스의 글들을 통해서도 2세기 말 3세기 초 소아시아의 교회에서 높이 존경받고 위엄을 가졌던 과부직제의 사역과 직위에 대해 알아보았다. 과부들은 지정석에 앉아 성찬 및 예전집례를 돕고 젊은 여성들을 가르치고 상담하며, 위로와 권면을 하는 것은 물론 참회자의 증인이 되는 역할도 담당했다. 과부는 덕망있는 삶과 영성과 기도로 회중의 역할모델이 되었다.

교회가 제도적으로 정착되면서 여성리더십이 교회로부터 소외되기 시작하였고, 과부들 또한 그 사역이 제한되고 지위가 격하되면서 전반적으로 과부의 위상이 축소되었다. 활발한 과부들의 사역을 의도적으로 축소하려는 노력들이 3세기 말과 4세기의 교회규정집들에서 발견되었다. *Didas*, *AC*, *CEA*, *라오디케아 법령*과 같은 규정집들에서 나타난 과부의 안수를 금지시키고 심방이나 환자를 위한 기도 등의 목회사역을 저지하는 것들이 대

표적이라 하겠다. 법령뿐만 아니라 과부를 비유하는 ‘하나님의 제단’의 해석에 있어서도 초창기에는 기도의 제사성과 성결과 헌신의 진정한 모범의 의미로 사용되었으나, 차츰 제단이 움직이지 않고 한자리에 고정되어 있다는 의미로 해석되었으며, 과부직제의 무게를 격하시키는 것으로 사용되었다. 제도적 교회로부터 지위와 활동이 제한되었을 때 이에 반발하는 부류의 여성과 교회는 *DT*를 중심으로 하는 교회들로 그들의 정체성을 지속하려 했는지도 모른다. *DT*는 억압과 규제에도 불구하고, 비록 주류에 들지 못했을 찌라도 과부의 안수와 목회사역 활동은 각자의 개성을 가진 교회에서 잔존했다는 증거이다.

— 주제어 —

과부, 초대교회 직제, 하나님의 제단, 여성사역

Widow, Church Order in the Early Church, Altar of God, Women Ministry

## 참고문헌

### 일차문헌

- The Apostolic Church Order*. Tr. J. P. Aremdzen, "An Entire Syriac Text of the *Apostolic Church Order*," JTS (1902), 59-80.
- The Apostolic Constitution*. ANF Vol. 7.
- The Apostolic Tradition*. P. F. Bradshaw, M. E. Johnson et. al. The Apostolic Tradition: A Commentary. Minneapolis: Fortress, 2002.
- St. Basil, Letter To *Amphilochius on the Canons*. Tr. R. J. Deferrari, St. Basil: The Letters. New York: G. P. Putnam's sons, 1934.
- Canons of Hippolytus*. Ed. P. F. Bradshaw, Tr. C. Bebawi. Cambridge: Grove Book Ltd, 1987.
- Canons of Laodicea*. F. Lauchert, ed. Die Kanones der wichtigsten altkirchlichen Concilien nebst den apostolischen Kanones. Frankfurt: Minerva, 1961.
- The Constitutiones Ecclesiasticae Apostolorum*. Tr. by J. P. Aremdzen, "An Entire Syriac Text of the Apostolic Church Order," JTS (1902)
- Clement of Alexandria, *Pedagogue*. ANF. Vol. 2.
- Didache. K. Niederwimmer, ed. *The Didache*. Minneapolis: Fortress Pres, 1998.
- Didaschalia apostolorum*. R. H. Connolly ed, *Didaschalia apostolorum*. Oxford: Clarendon Press, 1929.
- Origen, *Homilies on Luke*, Griechischen christlichen Schriftsteller. Leipzig: J. C. Hinrichs, 1936-1970.
- \_\_\_\_\_. *Commentary on John*. GCS 33.
- Polycarp, *To the Philippians*.. ANF. Vol. 1
- Shepherd of Hermas*. Carolyn Osiek, *Shepherd of Hermas: A Commentary*. Minneapolis: Fortress, 1999.
- Tertullian, *On Exhortation to Chastity*. ANF Vol. 4.
- \_\_\_\_\_. *To His Wife*. ANF Vol. 4.

\_\_\_\_\_. *On the Veiling of Virgins*. ANF. Vol. 4.

\_\_\_\_\_. *On Modesty*. ANF Vol. 4.

*Testamentum Domini Nostri Jesu Christi*. Ed. Nunc primum, latine reddidit et illustravit Ignatius Ephraem II Rahmani. Hildesheim: G. Olms, 1968; reprint of the 1899 edition.

이차문현

Beck, A. *Römisches Recht bei Tertullian und Cyprian*. Halle: Max Niemeyer, 1930.

Brown, F. et. al., *Hebrew and English Lexicon to the Old Testament*. Oxford: Clarendon, 1957.

Brown, P. *The Body and Society: Men, Women and Sexual Renunciation in Early Christianity*. New York: Columbia Univ. Press, 1988.

Dibelius, M & Conzelman, H. *The Pastoral Epistles*. Tr. P. Buttolph & A. Yarbro. Philadelphia: Fortress, 1972.

Eisen, U. E. *Women Officeholders in Early Christianity: Epigraphical and Literary Studies*. Collegeville, Minnesota: The Liturgical Press, 2000.

Gaster, T. H. "Sacrifices and Offerings," *Interpreter's Dictionary of the Bible* 4.

Gryson, R. *The Ministry of Women in the Early Church*. Collegeville, Minn.: Liturgical Press, 1976.

Hess, H. "Changing Forms of Ministry in the Early Church," in *Sexism and Church Law*. Ed. J. A. Corriden. New York: Paulist Press, 1977.

MacDonald, D. R. *The Legend and the Apostle*. Philadelphia: Westminster Press, 1983.

Methuen, C. "Widows, Bishops and the Struggle for Authority in the Didascalia Apostolorum" *JEH* 46 (1995), 197-213.

Robinson, C. *The Ministry of Deaconess*. London, 1898.

- Danielou, J. *The Ministry of Women in the Early Church*. Tr. Glyn Simon, London: The Faith Press, 1974.
- Oiek, C. "The Widow as Altar: The Rise and Fall of a Symbol" *Second Century* (1983), 159-169.
- Porte, J. L. "The Elderly in the Kife and Thought of the Early Church," in *Ministry and the Aging*. Ed. W. M. Clements. San Francisco: Harper & Row, 1981.
- \_\_\_\_\_. *The Role of Women in Early Christianity*. Lewiston: Edwin Mellen, 1982.
- Schoedel, W. R. *Ignatius of Antioch : A Commentary on the Letters of Ignatius of Antioch*. Philadelphia: Fortress, 1855.
- Scott, E. F. *The Pastoral Epistles*. New York: Harper & Bros., 1936.
- Stählin, C. "chēra" *Theological Dictionary of the New Testament*. Vol. 9. Ed. Gerhard Kittel and Gerhard Friedrich. Tr. Geoffrey W. Bromiley. Grand Rapids, Mich. : W. B. Eerdmans, c1985.).
- Thomas, W. F. "The Place of Women in the Church at Philippi," *Expository Times* 83 (1972), 117-120.
- Thurston, B. B. *The Widows: A Women's Ministry in the Early Church*. Minneapolis: Fortress, 1989.
- Turner, H. "Ministries of Women in the Primitive Church" in *Constructive Quarterly* (1919), 119-125.
- Zscharnack, L. *Der Dienst der Frau in den ersten Jahrhunderten der christlichen Kirche*. Göttingen: Vandenhoeck & Ruprecht, 1902.
- 차정식, "가난한 성직의 한 내력," 「신학사상」(1999, 겨울), 131-159.
- 채승희, "요한행전에 나타난 여성 금욕주의 공동체," 「한국교회사학회지」(2007, 4), 243-279.

**Abstract**

## The Role and Position of the Order of “Widow” in the Early Church

Chae, Seonghee

(Youngnam Theological University & Seminary)

It is grateful for recent interest in the role and position of women in the early church has increased. Thanks to this scholarly work, I have focused on “widow” as an order of early church regarding its roles and meaning. The term ‘widow’ in the early church was not simply a woman who had lost her husband by death, not remarried, but an order of church installed for women. Religious women devoted their life to Christ through the order in the organized church.

In order to provide the evidence for the ‘widow’ as church order, I examined the primary New Testament text. Next I discussed the references to the widow’s order in the writings of church Fathers, and several books of church orders. By examining these literary documents, I have seen the rise and fall of a role and position of widow. Widows filled an important and recognized place in the life of christian communities at least until the beginning of the third century. However, as church developed from primitive community to institutional system, a gradual process of



transformation began in leadership and organizational model of church.

The attempt to restrict widows' active involvement in ministry of church are evidently presented in using metaphor of widow: the widow as the altar of God. Until about the third century, that symbol honorably referred to widows' dedication and holiness and purity in their life. A generation later, the image was interpreted to instruct that women should stay at home because the altar of God does so. The metaphor that compared to the widow to the altar of God was once a powerful symbol expressing a spiritual and social relationship of widows and other members of Christian community.

Nevertheless, we could draw from hierarchical church's attempt to restrict widows' position and activities an implicit conclusion regarding the widows' real field of activity. They baptized, taught, provided counseling, cared for the sick, forgave sins after sinners' penance, etc. With one later document, *TD*, the figure of the widow as an honored and responsible person in the Christian community beyond the point of declines rapidly.

## 국문초록

# 초대교회의 여성성직제도 ‘과부’의 역할과 지위

채승희

(영남신학대학 역사신학 조교수)

본 소고는 초대교회의 성직제, 과부에 관한 연구논문이다. 본고는 여성 성직제, 과부에 대한 초대교회의 자료들을 많이 소개하고 과부였던 여성들의 활동과 당시 교회에 미쳤던 의미들을 살펴보았다. ‘과부’는 단순히 남편을 잃은 여성을 지칭하는 단어로서가 아니라 교회여성들이 그리스도에 대한 사랑과 열정으로 교회사역에 참여하고 헌신할 수 있었던 통로가 된 직제이었다. 이는 제도적 교회가 인정한 성직이었으며 여성들은 공동체를 위해 기도했고 환자나 가난한 자들을 심방하고 구제했으며 교회의 형편에 따라 예전에 참여하여 사제처럼 감독을 돕기도 했다. 그들은 그 인품과 영성, 그리고 섬김의 모델로 존경받았다. 성경과 (특히 묵회서신), 속사도시대 문서들과 초대교회 교부들의 글, 그리고 여러 교회규정집들에서 과부직제에 대한 기록들이 발견된다.

초창기 초대교회 공동체에서 과부들의 위상과 사역은 나름대로 존중되었고 공동체 회원들의 역할 모델이 되었다. 그러나 차츰 교회가 제도적으로 모양을 갖추면서 과부들의 사역이 축소되었고 그 의미도 희미해졌다. 제도적 교회는 의도적으로 여성들을 리더십에서 소외시키고 그들의 사역을 축소시켰다. 교회규정집들이 제시하는 과부 직제의 의미와 사역의 범위를

가 이를 잘 말해준다. 더욱이 과부를 비유하는 '하나님의 제단'의 의미도 후대에 갈수록 그 뜻과 상징이 왜곡 되게 나타난다. 처음 기도로 공동체를 중보하는 의미로 헌신과 희생, 성결로 공동체의 모델이 되었지만 여성을 가사율타리 안에 가두는 도구로 제단의 이미지를 사용함으로써 그들의 사역을 공공연히 폄하시키는 것이 눈에 띄게 나타난다. 제단은 움직이지 않고 한자리에 있는 것이므로 여성들은 집안에 있어야 한다는 의미로 해석하며 과부직제의 무게를 격하시켰다. 그러나 교회 규정집에 끝이지 않고 여성의 활동을 제한해야 한다는 항목이 나타나는 것은 역으로 그만큼 여성들의 활동이 활발했으며 이에 대한 요구가 계속 있었었음을 암묵적으로 말해준다고 봐야 한다.

본 소고는 제도적 교회에서 성직을 맡아 봉사하고 헌신했던 여성들의 역할과 가치를 새롭게 조명하여 기독교 역사를 균형 있게 펼쳐가는 데 기여하리라 믿는다.

접 수 일 (2013년 11월 7일)

수 정 일 (2013년 12월 3일)

게재확정일 (2013년 12월 3일)
