# Supplementary material for: The Growth, Decline, and Transformation of the Diaconal Ministry and the Role of Women Deaconesses in the Early Churches
Source: MDPI journal article supplement (doi:10.3390/rel14111415), 2023-11-12
Supplement: s1 [file s1]

# 기독교 집사직무 전통 속에서 여성디아코니아 직무와 역할에 관한 연구

김 옥 순

(한일장신대학교 교수 / 실천신학 / 디아코니아학)

## ■ 초 록 ■

오늘날 한국교회가 점점 더 생명력을 잃은 채 위축되어가는 위기 속에서 목회자들은 한국교회의 갱신의 길을 찾고 있다. 그런데 한국교회 위기요인 가운데 하나는 개신교가 지나치게 말씀선포에 집중하는 목사직무에 큰 비중을 둔 채, 복음에 기초한 예수제자 공동체를 보증해주는 교회의 디아코니아집사직무를 소홀히 해온 점을 부인할 수 없다. 본래 초기기독교공동체 이래로 개신교회들은 말씀선포직무와 함께 약자들을 돌보는 디아코니아직무를 수립하여 복음을 온전하게 보존하는 성장과 함께 성숙을 이어왔다. 이러한 교회직무 가운데 여성들이 동등하게 참여하였고, 특히 여성디아코니아직무를 통해 온전한 복음실천으로 교회와 사회를 섬겨 하나님나라 현실화에 기여하였다. 그런데 교회사전통 속에서 본연의 정체성을 가진 디아코니아집사직무가 위축, 소멸되어 기능하지 못했을 때, 교회는 수직위계지배 질서구조로 교회공동체를 타락시켰다. 이제 우리는 기독교전통 속에서 온전한 복음을 보존하고, 실천해온 디아코니아직무의 역사적 유산을 성찰함으로 오늘날 한국교회가 복음에 기초한 성장과 성숙하는 진정한 교회의 길을 재발견해야만 한다.

이러한 필요성 가운데 본 논문은 특히 교회직제 가운데 하나인 집사직무 속에서 여성안수집사직무와 역할에 대해 전승사적 문헌연구 방법을 통해 그 의미결과가 오늘

남 한국교회에게 줄 수 있는 도전과 가능성을 제시하고자 하였다. 즉, 한국 개신교회가 가부장적 수직위계질서구조를 극복하고, 각자 은사에 따른 만인사제직으로 여성과 남성이 동등하게 섬기는 교회의 집사직무와 활동을 연구함으로써 교회공동체 생명력 회복의 길을 제시하고자 했다. 따라서 본 연구를 통해 얻은 결론은 한국교회가 집사직무 본연의 고유성을 회복갱신하며, 설령, 그동안 여성안수집사직무를 수용하지 않았기에 이를 새로 도입하는 것에 한계가 있을지라도, 교회전통 속에서 여성안수집사들이 수행해온 디아코니아사역을 위해 현대적 요청에 적합한 교회 안에 공직적무형태의 여성지도력을 세워 섬기도록 하는 중요성에 도달하였다. 이는 한국 개신교 안에 성서의 남녀안수집사직무에 상응하는 현대적인 직무역할을 위해 안수 받은 기독교사회복지사 직무형태를 도입해서 목회직무를 돕고, 교회와 사회를 전문성 있게 섬김으로 교회의 생명력회복에 기여하도록 함이다. 따라서 한국개신교회가 섬김의 지도력을 통해 교회의 가부장지배구조를 극복하며, 교회 안팎에서 고통당하는 자들의 생명을 살리기 위해 해방구원 복음에 기초한 섬기는 디아코니아교회로 나갈 것을 제안하였다.

## 주제어

하나님나라 복음, 여성디아코니아, 집사직무, 여성안수집사, 디아코니아교회.

## I. 들어가는 말

오늘날 한국 개신교회는 예수가 선포한 섬김의 통치인 하나님나라 복음을 실망스럽게도 지배 군림하는 하나의 세상적인 기관의 전유물처럼 전락시켜가는 위협에 처해있다. 대체로 교회는 여전히 지배위계질서의 강자, 성공논리로 양적성장을 추구하면서, 고유한 복음의 능력을 잃어버리고 죽어가는 것이다. 이러한 상황 속에서 우리는 어떻게 교회가 진정한 하나님나라 복음을 보존, 실천함으로써 다시 생명력을 회복할 수 있는가에 대해 물어야 한다. 이는 교회가 하나님나라 복음을 생명력 있게 선포하며, 구체적으로 실천하기 위한 교회의 직무와 기구들에 대해 성찰을 요구하는 것이기도 하다. 왜냐하면 말씀을 통해 선포

된 복음을 신앙인과 교회가 실천하기 위해서는 교회직무와 구조들이 함께 기능해야 하기 때문이다.

그렇다면 한국교회가 성공지배원리의 세상적인 기구로부터 돌아서서 하나님 나라 복음을 받드는 진정한 교회로 회복되는 길은 무엇인가? 그 길은 한국교회가 서로 섬김과 봉사를 통해 생명을 살리는 하나님나라 복음실천을 위한 교회의 직무와 구조들을 철저히 새롭게 인식하는 것으로 볼 수 있다. 예수가 가져온 하나님나라 복음내용은 근본적으로 그 당시 정치, 사회적-종교적인 기득권층에 의해 여성을 비롯한 소외된 자들을 돌보신 디아코니아활동과 밀접한 관련을 가진다. 따라서 초기기독교 공동체들은 교회의 본질요소인 디아코니아실천으로 예수제자공동체로 보증 받았고, 역사 속에서 하나님나라 복음을 잘 전수해온 교회들은 안수집사직무를 세워 중단 없이 디아코니아를 실천해왔다. 교회는 지배권력의 위계질서구조가 아닌, 서로를 섬기는 디아코니아구조공동체로서 디아코니아활동을 전담한 안수집사직무를 수립하여 교회 안팎에서 위기에 처한 자들을 돌보았다. 특히 안수집사직무 수행자들인 남성과 여성들은 각자 은사에 따라 동등한 교회지도력으로 디아코니아활동을 하였다. 이처럼 교회의 디아코니아구조와 디아코니아직무는 하나님나라 복음내용을 현실화시켜내는 하나의 형태로 순기능을 한 것이다. 이제 한국교회는 교회사에 나타난 교회의 디아코니아직무직제와 활동의 순기능에 대해 깊은 성찰과 연구를 필요로 한다.

이러한 필요성에서 본 논문은 초기 기독교공동체 이래로 교회사속에 존속해온 여성디아코니아직무와 역할에 대한 연구를 문헌중심의 전승사적 방법으로 진행할 것이다. 이때에 교회직제 가운데 하나인 집사직무가 병행적으로 살펴질 것이다. 왜냐하면 여성안수집사직무는 교회의 집사직무 속에서 여성과 남성이 함께 디아코니아활동을 수행한 공적직무이기 때문이다. 무엇보다도 본 연구의 목적은 섬김을 통한 생명력 넘치는 진정한 교회로 회복될 수 있도록 교회의 집사직무 정체성회복에 도전을 주고자 하며, 특히 여성안수집사직무와 역할에 대한 연구로부터 얻은 의미를 가지고 오늘날 한국개신교회가 다양한 은사로 동등하게 섬기는 여성디아코니아지도력을 수용해서 교회 안에 수직위계질서구조를 극복하며, 하나님나라 복음증언으로 디아코니아사역을 통한 디아코니아교회 회복의 길을 제시함에 있다.

## II. 초기 기독교공동체 집사직무 속에서 여성디아코니아

### 1. 하나님나라 복음과 여성디아코니아

우리가 복음서를 살펴보면 대체로 예수는 전통적인 남성중심의 가부장적 사회체제를 해체시킨다. 즉, 마태기자는 그 동안 유대가부장적 가족제도 속에서 남성중심의 이기주의와 소유욕에서 여성들을 가사일로 희생시키는 전통적인 가족구조를 해체시키고, 여성들의 권리를 회복시켜주는 대안가족을 제시하였다. 물론 가부장적 이스라엘-유대사회에서도 예외적으로 여성들 가운데 정치적인 영역에서 공직수행을 한 사람들(미리암, 드보라, 홀다 등)이 있었으며, 왕궁에서 주방일과 빵굽는 일(삼상 8:13), 가수(삼하 19:36; 대하 35:25), 조산부(출 1:15)의 직업을 가진 자들도 있었으나, 대부분의 여성들은 부역일 중심의 가사일을 하였다.<sup>1)</sup> 이러한 전통과는 달리 복음서에 나타난 가족제도는 모든 인간이 그리스도 안에서 동등한 메시아적 관점에 의한 아주 새로운 가족형태이다. 이것은 바로 예수가 선포한 하나님 나라의 ‘하나님의 가족’(Familia Dei) 공동체에서 여성들도 동등한 권리를 가진 구성원이 된 것이다.

여기서 중요한 것은 예수가 선포한 하나님나라 복음의 핵심이 ‘디아코니아’와 관련되는 점이다. 예수는 그 당시 세속사회에서 “식탁에서 시중들다”는 근본 의미를 가진 “봉사하다”(diakonein)용어로<sup>2)</sup> 가부장적 유대사회에서 관습화된 여성의 지위와 역할을 완전히 바꿔놓았다. 즉, 예수는 자신을 ‘식탁에서 시중드

1) E. S. Gerstenberger/ W. Schrage, *Frau und Mann*, (Stuttgart/ Berlin/ Köln/ Mainz: Verlag W. Kohlhammer GmbH, 1980), 55.

2) 그리스어 동사원형 “디아코네인”(diakonein)은 그리스 역사가 헤로도토스(Herodotus: 기원전 484-430년경)이래로 사용되었고, 세속사회에서 “식탁에서 시중들다”는 근본 의미를 가지며, 파생된 의미로 생계돌봄을 비롯해 많은 의미를 가진 것으로 신약성서 속에서 신학적으로 고양된 의미를 가진다. 이러한 의미스펙트럼이 알렉산드리아의 필로(Philo)와 플라비우스 요세푸스(F. Josephus)에게서 발견된다 (S. Bieberstein, “Engasierte Frau im Lukasevangelium,” ed. A. M. von Hauff, *Frauen gestalten Diakonie, Band I: Von der biblischen Zeit bis zum Pietismus*, (Stuttgart: W. Kohlhammer GmbH, 2007), 104).

는 자'인 "디아코노스(diakonos)"로 명명하였고, 그를 따르는 모든 제자들에게 높아지려는 지위싸움과 가부장적인 지배구조를 극복하고 다른 사람을 섬기는 봉사자(diakonos)가 될 것을 요구하였다(요 13장; 막 10:42-45). 섬기는 자로서 예수는 하나님나라 복음을 말씀선포로 그리고 죄인들과 함께하는 식탁공동체 및 병든 자들을 치유하는 디아코니아실천으로 구체화하였다. 이처럼 예수가 선포한 하나님나라 복음은 말씀과 디아코니아행동이 하나의 통일성을 이룬다. 예수는 하나님나라 복음내용을 그 당시 여성이나 노예들에게 해당하는 가사일 중심의 "봉사하다(diakonein)"단어로 사회적 지위경계선을 허물었고, 그의 제자 공동체에서 여성들의 지도력을 인정했다. 이제 단어 "봉사하다(diakonein)"는 하나님나라와 관련된 신학적인 의미를 가진 디아코니아행동으로 가사 일을 여성의 일로, 말씀선포를 남성의 일로 고정시키지 않았고, 모든 제자들을 향해 디아코니아를 요구한 것이다. 따라서 예수의 제자가 되려는 특히 남성들은 그 당시에 사회문화적으로 가부장적인 관습에 의한 성적 계급적 차별을 극복하고 식탁에서 시중드는 자처럼 섬기는 자가 되어야만 한다(막 13:34; 눅 12:37; 17:8).

그런데 예루살렘에 유대크리천 신앙공동체는 자유인 남성들의 일과 노예나 가정주부들의 일 사이에 전통적인 사회적 경계선을 가진 말씀봉사와 식탁 봉사 일을 분리하였다(행 6:1절 이하). 그러나 헬라크리스천들은 말씀봉사와 식탁봉사에 대한 분리를 수용하지 않았다. 즉, 식탁봉사 전문가인 7명은 말씀봉사사역도 함께 하였다(행 6:8; 8:4,5; 11:19). 이는 복음의 말씀과 사랑의 디아코니아실천이 동등하게 중요함을 보여주는 것이다.<sup>3)</sup> 이러한 연관 속에서 설령 마르다의 식탁봉사가 불평으로 인해 칭찬받지 못하였을지라도, 식탁봉사는 좋은 것이며, 마리아와 마르다의 이야기는 섬기는 일에 말씀과 식탁봉사 둘 다 큰 역할을 하고 있다. 그런데 마치 식탁봉사와 말씀 배우는 일이 서로 대립되는 것처럼 보이는 장면은(눅 10:38-42; 11:27절 이하) 초기교회공동체 안에서 집안일을 해야만 했던 여성들이 항상 군소리 없이 일하지 않았음을 보여주는 것이며, 오히려 중요한 점은 당시 유대사회에서 교육기회를 차별당한 여성들도 교육받을 권리자

3) G. Schille, "Konfliktlösung durch Zuordnung," ed. G.K. Schäfer/Th. Strohm, *Diakonie - biblische Grundlagen und Orientierungen 3. Aufl.*, (Heidelberg: Heidelberger Verlagsanstalt, 1998), 255.

임을 보여주는 것이다.<sup>4)</sup> 이는 마리아와 마르다이야기 속에서 하나님나라 복음인 말씀봉사와 식탁봉사 관계를 올바른 말씀영성과 이웃사랑실천이 밀접하게 연관됨을 종합한 것이다. 이처럼 디아코니아는 하나님나라 복음의 본질요소로 말씀선포와 동등하게 중요한 것이다.

또 다른 관점에서 여성들의 디아코니아사역은 예수의 제자직과 관련된다. 이를테면 예수가 과부 베드로 장모의 병을 치유해주었고, 그녀가 음식을 만들어 예수를 섬긴 것은 사실상 제자직무에 대한 이야기다(막 1:31, 눅 5:1-11, 27-31). 여기서 식사대접은 치유에 대한 감사표시가 아니라, 그녀가 예수와 거룩한 자들을 섬기는 것(디아코니아)으로 제자임을 입증하는 것이었다. 또한 예수가 예루살렘으로 가는 길을 “남성들 곁에서 따랐던 갈릴리 여성들이 예수를 섬겼다”(막15:41: *θηκώνον αὐτῷ*)는 표현에서 그를 “섬기다”(diakonein)는 “따르다”(akolouthēin)는 제자직무와 병행을 이룬다. 그 당시 가부장적인 가정경제 상황에서 여성들은 예수를 섬기는 가운데 하나님나라 운동을 위해 재정적으로 남성들의 생계를 돌봤고, 물질이외에도 각자 가진 것으로 섬겼다(눅 8:1-3). 이 여성들은 예수와 함께 예루살렘까지 올라갔고 십자가까지 따랐으며 부활을 증언하였다. 이러한 디아코니아 섬김이 예수제자의 척도였고 여성들은 예수를 섬기고 따르는 여성제자들이었다.<sup>5)</sup>

결론적으로 신약성서에서 디아코니아는 하나님나라 복음의 핵심내용으로 기존의 지배적 가부장가족제도 속에서 여성들의 역할과 지위한계를 극복하고 여성들을 새로운 ‘하나님의 가족’구성원으로 하나님나라사역에 동등하게 참여토록 한 것이다. 동일한 한분 하나님의 우주적인 가족으로서 남성과 여성은 예수와 더불어 능력을 갖고 동등하게 섬김의 통치를 하게 되었다. 이제 복음공동체 안에서 자유인 남성들은 여성이나 노예들과 차별된 특별한 지배위계질서나 역

4) 누가복음에서 식사대접은 좋은 일이며 원하는 가치 있는 행동이다. 예수는 파송한 제자들을 대접하는 자를 “평화의 자녀”로 표현하였다. 누가복음 10장 38절 (diakonia)에서 마르다는 이와같은 일을 실천한 자로 예수를 대접한 것이다(S. Bieberstein, “Engasierte Frau im Lukasevangelium,” 106). 비교: E. S. Gerstenberger/W. Schrage, *Frau und Mann*, 108.

5) S. Biberstein, “Engasierte Frauen im Lukasevangelium,” 97-108; E. S. Fiorenza, *Bort statt Steine Die Herausforderung einer feministischen Interpretation der Bibel*, (Genossenschaft Edition Exodus: Freiburg/ Schweiz, 21991), 44-45.

할도 가지지 않는다. 이러한 여성역할의 변화 때문에 신앙인들 사이에 내부적인 갈등이 계속되었고, 특히 목회서신에서는 가부장적 가족에 대한 유비로 교회공동체를 재조직하려는 세력들이 있었음을 보여주기도 한다(딤후 3:4,5). 그림에도 분명한 것은 신약성서의 디아코니아에 대한 신학적 개념은 근본적으로 지배가부장제도에 대한 비판이었다.<sup>6)</sup> 이제 예수제자로서 여성들은 가정영역의 가사 일에 제한된 것이 아니라, 하나님나라 동역자로 하나의 성령을 받아 각자의 은사를 가지고 교회에서 공식적으로 남성과 함께 복음 선포사역(예언자, 교사, 유랑선교사 등)과 사랑의 디아코니아실천으로 예수제자역할을 감당한 것이다(고전 12:4 이하). 이처럼 모든 신앙인은 동등한 인격체로 복음에 나타난 하나님의 뜻을 행하는 사랑의 디아코니아실천 공동체를 실현해야 한다(막 3:35; 마 5:45).

## 2. 초기기독교 공동체 집사직무 속에서 여성집사직무와 역할

신약성서에서 디아코니아는 하나님의 일 또는 예수의 복음에 나타난 섬김의 일로 교회공동체에게 필수적인 것으로 증언되며, 디아코니아 활동을 통하여 교회공동체가 성장하였다. 그래서 하나님을 섬기는 자들은 철저히 성도들에 대한 섬김과 교회공동체를 섬겨야하며, 또한 교회지도력은 말씀선포와 디아코니아 활동을 분리시켜서는 안 된다. 교회공동체는 생계 돌봄을 비롯한 사회적 약자를 돌보는 디아코니아를 통해 교회공동체와 공동체밖에 있는 자들의 위기를 제거해야만 한다. 따라서 후기 신약시대 이후 교회공동체들은 디아코니아활동을 전담하기위해 집사직무를 수립하였다.

사실상 2세기 후반부터 기독교 교회공동체 안에 직제직무로 감독들, 장로들, 집사들과 함께 과부들이 나타나며, 과부들은 디아코니아임무를 행하며 교회공동체에 의해서 인정받았다. 우리는 초기 기독교 공동체에서 과부들이 공식적 직무로 생계 돌봄의 사랑활동을 수행한 것에 대해 알 수 있다(비교: 5장 3-16

6) L. Schottroff, "Dienerinnen der Heiligen. Der Diakonat der Frauen im Neuen Testament," ed. G.K. Schäfer/Th. Strohm, *Diakonie - biblische Grundlagen und Orientierungen 3. Aufl.*, (Heidelberg: Heidelberger Verlagsanstalt, 1998), 361.

절). 즉, 여성 집주인들은 그들의 재정을 가지고 과부들을 수용해서 디아코니아 돌봄을 수행했다. 특히 다비다와 함께 읍바에 있는 과부들은 직물을 짜서 생계 유지를 하였고, 이는 신앙인들에 의해서 인정받는 의롭고 선한 구제행동이었다 (행 9:36-43).<sup>7)</sup> 이러한 디아코니아활동은 기본생계보장뿐 아니라, 초기교회공동체의 도움에 전적으로 의존하는 가난한 과부들에게 옷을 입혀줌으로 위상을 세워주는 사회통합과 관련되었다. 즉, 디아코니아 돌봄은 기본 생계보장을 넘어 지위인정, 결속감, 연대성과 낯선 자를 환대하는 개방성으로 교회 안에 통합을 가능하게 하였다. 이러한 디아코니아 돌봄은 빈곤을 극복할 수 있는 의로운 행동으로 하나님나라를 현실화해준다. 여기서 중요한 것은 생계보호 받는 과부들 ( 딤후 5:16)이 교회공동체 안에서 존경받는 일을 하며, 선행을 하는 주체이기도 하였다. 과부들은 교회에서 공적직무로 고아들을 돌보았고, 갇힌 자들을 위해 음식을 만들어 생계를 돌봤고, 집안으로 들어가서 가르쳤다(5:13; 2:12). 초기 공동체 속에서 이러한 과부들의 사역은 예언자적이고 선교자적인 말씀을 사랑의 디아코니아활동과 연결시킨 것이며, 이는 디아코니아활동이 말씀선포와 밀착된 관계를 보여주는 것이다. 이처럼 과부들은 생계보호를 받는 자이면서 동시에 성도들을 섬기는 “디아코닌”(diakonin)이었다.

그렇다면 초기기독교공동체의 집사직무로서 전문적인 여성디아코니아직무와 활동은 어떠한가? 초기기독교 안에서 여성들이 수행하는 봉사직무는 신약성서 속에 크게 두 가지로 볼 수 있다. 그 하나는 여성들이 비전문적으로 하는 봉사와 다른 하나는 전문적인 봉사로 여성 집사직무이다. 이때에 신약성서에 나타난 여성봉사의 전문직과 비전문직에 대한 구분은 봉사의 질적인 차이가 아닌, 교회역사 속에서 집사직무 제정시점에 의한 것으로 볼 수 있다. 따라서 우리는 복음서를 중심으로 예수운동에 참여한 여성제자로서 말씀선포를 포함한 비전문직의 여성봉사자들과, 초기기독교공동체에서 뢰뵐(롬 16:1-2)을 비롯

7) A. Stradhartinger, "Witwen im Neuen Testament," ed. A. M. von Hauff, *Frauen gestalten Diakonie Band I: Von der biblischen Zeit bis zum Pietismus*, (Stuttgart: W. Kohlhammer GmbH, 2007), 153-154. 참고: F. Erichsen-Wendt, "Tabita: Zur Symbolik der Kleider in Apg 9,39," ed. A. M. von Hauff, *Frauen gestalten Diakonie, Band I: Von der biblischen Zeit bis zum Pietismus*, (Stuttgart: W. Kohlhammer GmbH, 2007), 123.



하여 사도직으로서 말씀선포를 포함한 전문직 여성봉사 집사직무로 구분할 수 있다.

그런데 우리가 초기기독교 공동체에서 여성 디아코니아전문 집사직무에 대해 살펴볼 때, 신약성서가 남성중심의 언어를 사용하였고, 여성집사직무에 대한 학문적 전통역시도 가부장적 관점에 의해 뚜렷이 손실되었기에, 단지 우리는 초기기독교 공동체에서 여성들이 수행하는 디아코니아직무가 남성명사 복수형 “집사들”(diakonoi)로 표현된 포괄적인 용어 속에서 일하였음을 알 수 있다.<sup>8)</sup> 이를테면 교회공동체 지도력직무가 빌립보서 1장 1절에서 감독들(episkopoi)과 집사들(diakonoi)로 표현되었는데 이는 통상적으로 남성들로 이해되었다. 그러나 로마서 16장 1-2절에 나오는 뵈비는 바울이 디아콘(diacon)으로서 일한 것과 동일한 의미에서 ‘디아코닌’(diakonin)이었다.<sup>9)</sup> 바울은 자신의 사역에 대해 “그리스도의 디아코노스”요, “교회의 디아코노스”로 증명하였고, 박해와 고난을 당하는 사역을 진정한 그리스도의 사도직을 감당하는 하나님의 디아코니아에 속한 것으로 보았다(고후 6:4절 이하; 11:23절 이하). 이러한 바울과 함께 뵈비는 교회공동체 안에서 생계유지 돌봄을 수행하였고, 나아가 말씀선포를 하였다. 이는 초기기독교 공동체 속에서 그녀의 신앙의 영적은사와 디아코니아가 당연히 결합되었음을 보여준다. 이렇듯 뵈비는 바울이 섬기는 자(디아콘)로서 일했듯이, 그와 똑같은 의미에서 섬기는 여성(디아코닌)이었다. 여기서 우리는 뵈비가 전문직 여성집사직무를 수행한 것을 알 수 있다. 그 이외 여성들도 교회공동체를 위해서 생계유지만 돌본 것이 아니라, 말씀선포 일도 수행하였다. 그들은

8) L. Schottroff, "Dienerinnen der Heiligen. Der Diakonat der Frauen im Neuen Testament," 333-361.

9) 뵈비는 가정교회 의장(prostatis)으로서 보호의무를 가진 “수호자”(Patronin)로 겐그레아 가정교회공동체를 위해 다양한 과제를 수행한 섬기는 여성(diaconin)이었다. 그녀는 여성 집주인으로 성도들에게 주거와 생계돌봄을 하였고, 낯선 자들에게는 정치적 망명자 보호, 나그네를 계속 여행할 수 있도록 재정지원 등 그들에게 필요한 모든 지원과 도움을 주었다. 또한 그녀는 교회공동체 안에서 뿐 아니라, 거리에서 말씀 선포자로 일하였다(A. Merz, Phöbe, "Diakon(in) der Gemeinde von Kengreä - Eine wichtige Mitstreiterin des Paulus neu entdeckt," ed. A. M. von Hauff, *Frauen gestalten Diakonie Band I: Von der biblischen Zeit bis zum Pietismus*, (Stuttgart: W. Kohlhammer GmbH, 2007), 136-140).

복음의 선포자들로 사도들이었음을 알 수 있다.

나아가 목회서신 디모테 전서 3장 11절은 이미 고대교회에서 전문적 여성디아코니아 직무와 관계되었음을 보여준다. 우선, 집사직무와 관련해볼 때, 목회서신저자는 감독들과 집사들을 구분하지만, 여기서 이 두 차원의 교회직무기능들은 본질적으로 위계질서 차이가 없다.<sup>10)</sup> 그러나 후에 집사직무는 다양한 봉사활동기능직무로 일컬어졌고, 감독칭호는 하나의 감시직무를 표시하였다. 여하튼 목회서신에 나타난 감독, 집사직무는 엄밀히 말해서 전문성을 가진 직업으로 교회공동체 안에서 직무수행능력과 시간에 따라 급여를 받았다.<sup>11)</sup> 이러한 전문직 집사규정 가운데 분명하게 여성 집사가 있었다. 특히 디모테전서 3장 11절에 나타난 디아코니아수행을 위한 자격요구는 남성 집사의 아내에게 해당하는 것이 아니라, 여성 집사에게 해당하는 것이다.<sup>12)</sup> 따라서 디모테 전서 3장 11절속에 나타난 집사직무는 디아코니아 전문직 여성들이 여전히 남성명사 복수형 “집사들”(diakonoí)로 표현된 의미 속에서 일한 것으로 볼 수 있다. 이는 저자의 의도가 가부장적인 사고로 교회공동체의 지도력을 남성중심으로 재조직하려는 관심 속에서 여성들을 잘 고려하지 않은 것으로 볼 수 있다.<sup>13)</sup>

### III. 교회 집사직무의 변화 속에서 여성디아코니아직무와 역할

#### 1. 교회공동체 안에서 집사직무의 발전과 변화

우리가 교회사속에서 여성안수집사직무와 역할의 변화를 살펴보려면 먼저,

10) M. Mezger, *Die Amtshandlung der Kirche als Verkündigung, Ordnung und Seelsorge, Band I Die Begründung der Amtshandlung*, (München: Chr. Kaiser Verlag, 1957), 27-28.

11) J. Roloff, *Die Kirche im Neuen Testament*, (Göttingen: Vandenhoeck & Ruprecht, 1993), 263.

12) U. Luz, "Biblische Grundlage der Diakonie," ed. G. Ruddat/ G.K. Schäfer, *Diakonische Kompendium*, (Göttingen: Vandenhoeck & Ruprecht, 2005), 32.

13) L. Schottroff, "Dienerinnen der Heiligen. Der Diakonat der Frauen im Neuen Testament," 361.

교회의 직제로서 안수집사직무의 변화를 조명하는 것으로 출발하는 것이 타당할 것이다. 그런데 우리가 일반적으로 말할 수 있는 것은, 비록 교회의 본질적 직제인 감독과 집사(빌 1:1)에 대한 유래와 기능에 대하여 아주 명확하지는 않을지라도, 이러한 직무들은 서로 도우면서 교회공동체를 건설 발전시켜간 점이다. 물론 이 직무들은 교회를 섬기며, 교회가 타자를 섬길 수 있도록 기능하는 것이다. 교회의 이 두 가지 직무형태는 이미 2세기 초반에 이그나티우스에게서 세 가지 직무인 “하나님 모형”의 감독과 “예수그리스도 모형”의 집사와 “사도들의 모형”인 장로로 나타나며, 이 세 가지 직무는 동등한 위치에서 기능한 것으로 나타난다.<sup>14)</sup> 이러한 감독과 집사와 장로 세 가지 교회직제는 영적직무로 3세기를 넘어서까지 목회 범주 속에서 교회가 활발하게 확장하도록 도왔다. 특히 3세기 교회공동체 안에서 감독을 필수적으로 돕는 자들로 남성과 여성집사들은 세례와 성례전봉사 및 전반적인 복지영역에 등장하여 종신직무로 활동한 교회의 고유한 직제였다.<sup>15)</sup> 그러나 집사직무의 왜곡된 변화는 특히 제 4세기인 콘스탄틴시대 전환기에 이르러서다. 콘스탄틴황제는 핍박받는 기독교를 허용, 장려하는 가운데 교회의 확장을 가져왔고, 국가법으로 교회공동체에게 디아코니아제정을 지원하였다. 그래서 교회공동체의 디아코니아는 단지 국가적인 지시에 의해서 감독이 주도적으로 이끌었다. 이러한 상황 속에서 그동안 지역감독과 밀접하게 연관되어 동등한 위치에서 일하던 집사들은 고유한 역할을 수행하지 못한 채, 점점 감독사제직에 의해 흡수당해갔다. 하나님의 교회를 위해 말씀선포직무와 함께 반드시 존재해야하는 디아코니아집사직무가 이제 단지 사제로 오르는 긴 수직단계 속에서 낮은 단계에 잠정적으로 머무는 훼손된 위상으로 전락되었다. 이는 그 당시 로마제국의 수직통치구조시스템에 의한 영향으로 교회 안에서도 높고 낮은 수직위계질서 원리가 지배하게 되었고, 대체로 감독들은 교회 신앙인들과는 거리를 둔 채 성직을 수행하였다.<sup>16)</sup> 이렇듯 교회 안

14) 재인용, K. Berger, *Was ist biblische Spiritualität*, (Gütersloh: Gütersloher Verlagshaus GmbH, 2000), 210.

15) P. A. Leder, *Die Diakone der Bischöfe und Presbyter und ihre urchristlichen Vorläufer*, (Stuttgart: Evangelisches Verlagswerk GmbH, 1905), 11-13.

16) W. Schneemdlcher, "Der diakonische Dienst in der Alten Kirche," ed. H. Krimm, *Das diakonische Amt der Kirche*, (Stuttgart: Evangelische Verlagshaus GmbH,

에서 세속화된 국가이념의 지배통치구조가 하나님나라 섬김의 통치를 변질시키는 가운데 기독교 디아코니아도 그 고유한 정체성을 잃은 채, 점점 더 세속화의 길을 걸었고, 디아코니아 수행자인 종신직 집사들은 직무를 잃게 되었고, 교회공동체들은 계속 문을 닫게 되었다.<sup>17)</sup> 이러한 영향이 중세에 이르러 디아코니아를 전담한 집사직제가 완전히 사라지게 된 주요요인이다.

결론적으로 교회역사와 사회 환경변화 속에서도 중단 없이 이어온 디아코니아집사직제는 중세에 이르러 사라지게 되었고, 중세초기부터 점점 더 사제일방주의의 수직적 지배위계질서로 치닫는 교회세속화에 반대하는 운동으로 평신도 신앙운동은 교회개혁과 디아코니아개혁을 위한 수도원공동체 등장에 중요한 역할을 하였다.

## 2. 여성안수집사직무와 역할의 변화

교회사 속에서 변화되어온 집사직무 맥락 속에서 여성들의 집사직무와 역할도 동방과 서방교회전통 속에서 각각 달리 변화하였다. 먼저, 동방교회에서 여성안수집사직무는 3세기 시리아 교회법인 디다스칼리아(Didascalia) 속에 분명하게 증언된다. 즉, 남성안수집사와 여성안수집사는 동등한 집사직무(*diaconi*)로 디아코니아 사역(*ministerium diaconiae*)을 분담하였고, 특히 여성안수집사가 교회사역의 3위 유형 속에 자리한 직무로 - 감독은 하나님의 위치, 남성 디아콘은 그리스도의 위치, 여성 디아코닌은 성령의 위치에서 - 존경받는 고유한 위치를 가졌다. 이러한 3위유형론은 4세기 말에 교회법인 ‘사도전승법’ 속에 전수되었고, 거기서 “디아코니싸”(diakonissa)로 불린 여성안수집사직무는 감독의 임직기도와 안수받고 임직된 집사직무로 교회 안에 분명하게 규정되었다. 4세기부터 여성안수집사에 대한 증언들이 안디옥, 예루살렘, 팔레스틴의 케사레아, 캅바도기아 그리고 콘스탄티노플에서 나타난다.<sup>18)</sup>

1953), 87.

17) M. E. Kohler, *Diakonie*, (Neukirchen-Vluyn: Neukircher Verlagshaus, 21995), 250.

18) I. Raming, “Zur Geschichte des weiblichen Diakonats.” ed. A. Arbeitshilfe zum Diakonat der Frau, *Die Kirche braucht diakoninnen*, (Münster: Claudius-Verlag, 1999). 5.

그렇다면 이처럼 동방교회 안에 분명하게 존속한 여성안수집사들은 임직식과 역할에 있어 혹시 남성집사들과 차이는 없었는가? 먼저, 수많은 여성과 남성 저술가들은 여성안수집사 임직이 남성안수집사와 똑같은 “보다 높은 성례전적 임직”(Cheirotonia)임을 증언한다. 즉, 성만찬제단에서 장로, 남성디아콘, 여성디아코년이 입회한 가운데 감독을 통한 안수와 임직기도와 무엇보다도 성만찬시에 제정사와 함께 성령강림기도(Epiklese)를 분명히 한 점이다. 반면에 혹자는 여성안수집사 임직예식 때 성례전이나 여성안수집사 위상이 남성안수집사와 차이가 있다고 본다. 즉, 여성디아코나는 남성디아콘과 달리 성만찬제단봉사에 세워지지 않았기에, 그들의 권한과 과제들이 남성디아콘과 차이를 가진 것으로 본다.<sup>19)</sup> 그러나 이러한 평가는 여성안수집사직무가 초기 중세교회 안에서 확산된 여성차별의 결과로 그 직무확장에 있어 방해받았음을 간과한 것으로 볼 수 있다.

나아가 우리가 여성안수집사들의 역할을 살펴볼 때, 그들은 다양한 영역에서 활동하였음을 알 수 있다. 먼저, 카리타스 영역에서 여성안수집사는 여성 환자를 돌보며, 가난한자, 어린이, 수발욕구자를 위해 상주하면서 돌봤다. 또한 목회, 교육영역에서 교리문답교육, 세례 전, 후 신앙인에 대한 안내와 가르침, 교회 안에 여성, 아동, 처녀들과 고아들을 위한 신앙교육 활동을 하였다. 나아가 예전예식 영역에서 봉사로 여성 세례 시에 알몸으로 물에 잠기는 세례를 도와주는 일, 견진성사 준비교육자 몸에 기름 붓는 일과 거룩해지는 기름(Chrismaöl)을 붓는 일이다. 이때 세례식 자체와 이마에 기름 붓는 일은 남성성직자가 수행했다. 또한 여성안수집사들은 여성 환자에게 성찬분배를 하였다. 이렇듯 광범위한 여성안수집사직무의 기능에도 불구하고, 시리아 교회법 속에 여성안수집사직무는 성만찬제단봉사를 수행하지 못하도록 하였다. 이와는 반대로 비잔틴 교회 속에서 여성안수집사직무의 성만찬제단봉사가 가능했던 것으로 보인다.<sup>20)</sup>

19) 동방교회에서 성례전 예식과 관련해서 다소 한 가지 차이가 있는 점은 성찬 제단에 접근성과 빵과 포도주 성찬요소에 대한 근접성에 있어 여성안수집사는 남성안수집사처럼 제단 접근성이 허용되었으나, 성찬집기들 보존유지는 할 수 없었다 (*Ibid.*, 7).

20) *Ibid.*, 6. 비교: 세례의 의미와 관련해서 김정두, “세례의 신학적 의미와 케노시스적 해석,” 『신학과 실천』 44(2015), 66.

다른 한편으로 서방교회에서는 동방교회에서와 마찬가지로 기독교의 외연확장이 있었으나, 견고한 여성디아코니아직무를 존속시켜온 동방교회와는 달리 상대적으로 여성안수집사직무가 증언되지 않는다. 갈리아와 남부 이탈리아 안에서 비잔틴이 주도한 몇몇 지역을 제외하고는 서방교회에서 여성안수집사들은 거의 찾아볼 수 없다. 이는 무엇보다도 동방교회와 서방교회 사이에 사회-문화적인 차이에서 비롯된 것으로 볼 수 있다. 이를테면 동방에서는 가정에서 남성들과 분리된 여성들 및 아이들에게 가르침과 안내를 위해 여성안수집사가 활동하였으나, 서방에서는 여성들이 보다 강하게 사회에 통합되었기에 동방교회에서처럼 동일한 기준의 여성안수집사들이 요구되지 않았고, 특히 남성중심의 가부장적사고 속에서 명목상 생리로 인한 ‘여성의 부정함’을 이유로 이미 4-6세기에 갈리아의 많은 노회들이 여성안수집사 안수를 분명하게 금지하였다.<sup>21)</sup>

이렇듯 교회의 다른 전통 속에서 발전해온 여성 디아코니아직무도 결국 사라지게 되었는데, 그 이유는 크게 두 가지로 볼 수 있다. 먼저 그 하나는 4세기에 콘스탄틴에 의한 기독교의 급격한 확장이다. 3, 4세기에 동방교회에서 존재한 여성디아코니아직무가 특히 4세기에 콘스탄틴에 의한 국가교회 발전과 유아세례로 인한 성인세례숫자감소로 인해 그동안 여성디아코인들이 예전과, 교리문답 등을 해온 고유한 역할과 의미를 점점 잃어갔으며, 단지 자선적인 카리타스활동으로 축소되어갔기 때문이다. 나아가 여성안수집사직의 쇠퇴에 대한 보다 광범위한 근본적인 원인은 가부장적 남성주도의 교회지도력구축을 위해 여성의 생리적 부정함을 앞세운 성차별적인 사고에서다. 즉, 여성안수집사들은 매월 생리로 인해 부정하게 취급받았고, 여성안수집사직무는 결국 예식영역과 거룩한 제단으로부터 쫓겨났다. 콘스탄티노플의 존경받는 교회에서 여성안수집사들을 뽑았으나, 그녀들은 더 이상 제단봉사가 허락되지 않았다.<sup>22)</sup> 이러한 원인들이 결국 교회공동체에서 여성안수집사직무를 축출시킨 것이다. 물론 여성 안수집사직무가 거의 11세기 까지 특히 비잔틴에서 광범위하게 존속하였으나, 점점 공적인 교회사역으로부터 배제되었다. 이처럼 이미 서방에서 그리고 동방

21) I. Raming, “Zur Geschichte des weiblichen Diakonats,” 6.

22) *Ibid.*, 7-8.

비잔틴교회 속에서도 여성안수집사직무가 사라지는 속에서 교회공동체봉사로 부터 배제된 여성디아코닌들은 금욕적 경향의 수도원 삶으로 퇴각해서 여러 곳에서 다른 방식으로 집회를 가졌고, 교회규정에 따른 여성공동체들을 이끄는 지도자들로 활동하기도 하였다.

주목할 만한 것은 여성에 의해 디아코니아활동으로 조직된 베기넨(Beginen) 수도원공동체이다. 중세의 경건한 여성운동으로 12세기 말에 조직된 베기넨공동체는 13세기 초엽에 이노센트 3세 아래서 교회의 수직위계질서 속에서 교황주의 권력이 절정으로 치달을 때, 세상에 남아있는 여성평신도들이 주도하였다. 중세 때 유럽에 넓게 확산된 베기넨 공동체들은 통일적인 수도원공동체로 성장하지는 않았으나, 경제자립을 위해 세상 속에서 값싼 노동의 직업을 가졌고, 이로 인해 15세기 중엽에 수공업자길드와 경쟁하는 갈등도 가졌다. 또한 15세기에 도미니칸 수도단은 베기넨을 금지시키려하였으나, 프란치스칸 수도단은 그녀들의 영혼돌봄을 위해 설교로 도왔다.<sup>23)</sup> 이러한 공동체들의 디아코니아활동은 금욕주의에 기여했을 뿐 아니라, 시대적인 사회위기제거를 위해 도왔다.

결론적으로 교회사 속에서 남성 집사직무가 완전히 소멸된 중세시기에 여성안수 집사직무는 보다 더 일찍 사라졌다. 이러한 시기 속에서 평신도 중심의 여성수도원공동체를 통한 디아코니아활동은 점점 더 치닫는 중세교황주의 지배구조교회를 갱신하는 하나의 운동으로 볼 수 있다. 나아가 사제일방주의로 타락된 중세교회를 바로잡기 위해 성서에 나타난 집사직무에 대한 갱신회복이 종교개혁 요소 가운데 하나이기도 하다.

#### IV. 개신교 집사직무 갱신회복과 여성디아코니아

23) 그녀들은 “세상 속에 있는 자매들”로서 성서 속에 나타난 마르다와 마리아의 두 가지 삶의 양식을 추구하였고, 날마다 이웃사랑 돌봄과 관상기도를 결합시켰다. 따라서 그들은 미혼녀와 과부들이 함께 공동체로 살면서 물질이 궁핍한 자들을 돌보았으며, 가난한 어린이들을 교육하였고, 병자간호와 임종환자들을 돌봤다(M. Wehrli-Johns, “Schwestern in der Welt: Beginen in Mittelalter und Neuzeit,” ed. A. M. von Hauff, *Frauen gestalten Diakonie Band I: Von der biblischen Zeit bis zum Pietismus*, (Stuttgart: W. Kohlhammer GmbH, 2007), 269-280).

## 1. 개신교 전통 속에서 집사직무의 회복과 디아코니아

종교개혁자들은 하나님과 인간 사이 관계에서 인간이해를 중시하였다. 루터(M. Luther)는 중세 토마스 아퀴나스의 스콜라신학에 영향 받은 로마카톨릭 공덕사상에 의한 칭의론이 하나님과 인간 사이를 분열시키는 타락된 의 사상으로 보았다. 루터에 의하면 인간은 오직 하나님의 은총(sola gratia)과 선물받은 신앙(sola fide)으로 의로워진 세례 받은 만인사제로서 성서중심(sola scriptura)의 선포하는 말씀(sola verbo)과 그리스도 중심(solus Christus)에 기초한 삶을 통해 교회개혁과 사회개혁에 헌신해야 한다.<sup>24)</sup> 그는 교회개혁을 위해 1520년에 쓴 “교회의 바벨로 포로에 대한 서언”(De captivitate Babylonica ecclesiae praeludium)에서 교회직제와 관련된 디아코니아활동을 강조하였고, 성서에 나타난 초기공동체의 7명 직무에 근거한 집사직무를 회복하였다. 그는 교회가 복음의 말씀을 읽고 선포하는 사역에 그쳐서 안 되며, 교회의 재산을 가난한 자들을 위해 사용해야 함을 강조하였고, 1523년에 교회직무와 관련된 설교에서 감독[목사와 설교자]들은 영의 양식인 복음을 나눠주며, 집사들은 부양받아야 할 가난한 자들의 목록을 만들어서 생계유지를 돌보게 하였다.<sup>25)</sup> 그는 칭의 신앙인에게 노동을 강조하여 직업소명을 일깨웠고, 이웃의 생계돌봄을 위한 고용창출까지 이끌었다. 또한 부겐하겐(J. Bugenhagen)은 각 교회공동체들에게 모든 교구에 안수집사(디아콘)를 선출하여 총체적인 기능을 수행하도록 하였고, 12명의 집사(디아콘)를 세워서 정확한 주중, 월별 프로그램을 실행하였다.<sup>26)</sup> 나아가 부처(M. Butzer)는 교회공동체는 그리스도의 몸이며, 디아코니아를 교회의 표지로 보았고, 성서에 기초한 원시기독교공동체에서 디아코니아를 전담하였던

24) Kirchenamt der EKD (Ed.), *Rechtfertigung und Freiheit. 500 Jahre Reformation 2017. Ein Grundlagentext des Rates der Evangelischen Kirche in Deutschland (EKD)*, (Gütersloh: Gütersloher Verlagshaus, 2014), 107. 비교: 한재동, “구원실재에 대한 참여로서 세례의 회복문제,” 『신학과 실천』 41(2014), 11-17.

25) 채인용, H. Krimm, *Quellen zur Geschichte der Diakonie, Bd.II*, (Stuttgart: Evangelisches Verlagswerk GmbH, 1963), 27-28.

26) Th. Strohm/ M. Klein(Hg.), *Die Entstehung einer sozialen Ordnung Europas, Bd. 2. Europäische Ordnungen zur Reform der Armenpflege im 16. Jahrhundert*, (Universitätsverlag Winter GmbH: Heidelberg, 2004), 13, 130.



집사직무를 회복시켜 교회개혁과 사회문제를 해결하는 사회복지개혁을 이끌어 냈다. 그는 교회의 재산을 십자가에 달리자의 소유로 보았으며, 교회의 재산은 가난한 자들에게 분배되어야 하며, 특히 집사들은 감독을 도우면서 사회적 약자들을 돌보며, 주립교회차원에서 사회문제들을 해결하였다.<sup>27)</sup> 그에 의해 회복된 디아콘(집사)직무는 종교개혁의 교회법령과 구빈법규정에 있는 하나의 당연한 기구였다. 나아가 부처에게서 디아코니아모회를 배운 사람으로 칼빈(J. Calvin)은 십계명 두 돌비 속에서 신앙과 봉사의 결합을 발견하였고, 말씀과 기도, 성만찬의 나눔과 가난한 자를 구제하는 사랑의 디아코니아활동이 없는 교회는 진정한 교회가 될 수 없기에, 교회는 성서에 나타난 집사직무를 회복함으로 항상 사회적 약자돌봄을 실천하는 형태로 존재해야 함을 강조하였다.<sup>28)</sup>

나아가 종교개혁전통에 맞닿은 경건주의자들과 각성운동가들도 디아코니아 활동을 위한 집사직무를 수립하였다. 그 가운데 각성운동가 비허른은(J. H. Wichern) 디아코니아를 “신학의 심장부”로 보았고, 하나님나라 가족원리에 의해 디아코니아를 실천하였다. 그는 교회가 온전하고 진정한 사회봉사를 위해 사도적인 안수집사직무를 재건하고, 남성안수집사들을 세워서 직업교육을 받고 교회의 사회봉사직무를 전담하는 자들로 급역을 받고 일하도록 하였는데 이러한 디아코니아는 교회공동체와 관련되는 것이다.<sup>29)</sup> 그러나 무엇보다도 중요한 것은 그와 동시대 각성가로 집사직무 속에서 여성안수집사직무를 전문화한 사람 테오도어 흘리드너(Th. Fliedner)였다.

## 2. 개신교 집사직무 전통 속에서 여성디아코니아직무와 역할

우리가 종교개혁자들이 회복한 집사직무 속에서 여성디아코니아를 살펴볼 때, 아주 다양한 스펙트럼을 발견할 수 있다. 먼저 루터는 여성디아코니아직무

27) W. Bernoulli, "Von der reformierten Diakonie der Reformationszeit," ed. H. Krimm, *Das diakonische Amt der Kirche*, (Stuttgart: Evangelisches Verlagswerk GmbH, 1953), 197-199.

28) W. Bernoulli, "Calvin und das Amt der Diakone", *Reformatio* 8, 1959, 331-333.

29) J. H. Wichern, *Sämtliche Werke III/1*, ed. Peter Meinhold, (Berlin/Hamburg: Lutherisches Verlagshaus, 1968), 145-147.

와 역할을 위해 교회공동체는 신실하고 나이가 많으며 비난받을 것이 없는 한 여성을 선출해서 연봉과 함께 자연물품을 받고 일하며, 개인적으로 촌지 받는 것을 절대금지 했다. 이 여성은 교회 안에서 디아코니아직무를 맡은 자로 12살 이하의 어린 소녀들에게 목양직무법령에 따라 낮에 개방된 장소에서 올바른 기독교신앙교육과 행동을 가르치며, 독일어 쓰기와 읽기를 가르쳤다.<sup>30)</sup> 그러나 루터에게서는 교회의 여성 집사직무가 아주 명확하지는 않다. 이와는 달리 부겐하겐은 여성안수집사들이 전적으로 권한을 위임받고 홀로셔야 하는 여성들과 병자들을 돌보도록 하였다. 나아가 무엇보다도 여성안수집사직무수립에 공헌한 부처는 사도시대에 남성과 여성들이 교회 안에서 가난한 자들과 환자들을 돌보기 위해서 선출되었듯이, 교회공동체 안에 가난한 자들, 병든 자들을 돌보기 위해 신앙인 남성과 여성안수집사들을 세웠다. 특히 그는 여성안수집사들을 세워 “신의 축복을 받은 처녀들”의 역할로 병자들을 돌보는 활동을 하도록 하였다.<sup>31)</sup> 칼빈은 성서에 가난한 자를 돕고 병자를 간호하는 일에 임직된 여성안수집사를 회복하려고 노력했다. 그는 여성안수집사들이 초기교회공동체 안에서 위임받은 공식직무로 디아코니아활동을 적극적으로 수행한 것을 알았기에 제네바시의회에서 여성안수집사직무를 관철시키고자 했으나 성공하지 못했다. 칼빈의 이러한 노력은 결국 독일 라인하류지역(Niederrhein)과 네덜란드에 영향을 주었고, 개혁교회 안에 오랫동안 여성디아코니아직무가 이어졌다.

그런데 중요한 것은 종교개혁으로 회복된 집사직무 속에서 여성들에게 동시에 회복된 여성안수집사직무와 함께 “오직 성서로만” 원리에 입각한 성서해석과 신앙관을 통해 여성소명을 일깨운 점이다. 먼저, 여성종교개혁자들 가운데 뮌헨의 아울라 폰 그룸바흐(Argula von Grumbach)는 성서말씀에 대한 탁월한 지식으로 구약과 신약성서 안에서 하나님의 여성상을 발견하였고, 세례 받은 만민사제로 예수그리스도에 대한 신앙고백을 실천하기 위해 소명 받은 여성으로 디아코니아영역에서 공적직무를 활발하게 수행하였다.<sup>32)</sup> 또한 인문주의

30) H. Krimm, *Quellen zur Geschichte der Diakonie, Bd.II*, 28. 비교: 장문규, “독일 어린이 예배에 대한 교회교육학적인 문제점 고찰,” 『신학과 실천』 39(2014), 358.

31) W. Bernoulli, “Von der reformierten Diakonie der Reformationszeit,” 197.

32) P. Matheson, “Martin Luther und Argula von Grumbach (1492-1556/7),” *LQ* 22(2008), 1-15.

여성종교개혁자 마가레타 블라러(Magarete Blarer)는 루터의 신학사상에 심취한 자로 청소년, 노인복지 디아코니아시설들에 의해 “여성디아코니아원형”(archidiakona)으로 불리며, 성만찬논쟁에 대한 루터와 츠빙글리의 사이를 중재하는 부처 입장에 반대하면서 츠빙글리 입장을 취했다. 그녀는 콘스탄츠에서 종교개혁 신학에 입각해서 신앙인이 성취해야 하는 개인적 시민적인 “디아코니아활동”과제 가운데 특히 아동교육과 환자를 돌봤다.<sup>33)</sup> 이러한 디아코니아 활동은 개신교가 수도원을 해체함으로 그동안 베기넨 자매들이 해오던 활동이며, 그녀는 개인적으로 아동교육과 병든 자들을 돌보는 일을 비롯해 교회정책 발전에도 기여하였다.

특히 슈트라스부르그에서 목회적-디아코니아직무발전을 이룬 여성종교개혁자 카타리나 슈츠 첼(Katharina Schütz Zell: 1497/8-1562)은 루터의 복음해석을 통해 구원을 발견하였고, 복음을 고백하는 것은 동시에 디아코니아실천임을 깨달았다. 그녀는 종교개혁 신학사고 속에 행동과 사고를 정초시켰고, 말씀선포가 곧 이웃사랑의 실천이며, 교회와 신앙인은 세례와 성만찬을 통해 이웃사랑 실천으로 예수그리스도의 제자와 소명에 참여하는 것으로 보았다.<sup>34)</sup> 따라서 그녀는 하나님의 사역가운데 복음의 직무로서 디아코니아직무를 이해하였고, 디아코니아활동을 복음의 본질요소로 인식하여 실천적인 삶을 교리보다 앞세우면서 디아코니아활동을 위한 여성디아코니아직무를 수행하였다. 그녀는 디아코니아활동을 개인 및 기관이 함께 할 것과 목회적-디아코니아사역을 단지 여성들의 사적활동이 아닌, 철저히 교회공동체의 공적직무활동으로 보았다.<sup>35)</sup> 이처럼 그녀의 종교개혁 중심은 자선활동과 디아코니아직무의 구조적발전에 놓여

33) U. Bejick, "Margarete Blarer (1493-1541). Humanistin, Reformatorin und Diakonin in Konstanz," ed. A. M. von Hauff, *Frauen gestalten Diakonie Band I: Von der biblischen Zeit bis zum Pietismus*, (Stuttgart: W. Kohlhammer GmbH, 2007), 295-304.

34) 비교: 김옥순, “성만찬 예전예배에 대한 해석학적 차원에서 디아코니아의미,” 『신학과 실천』 28(2013), 291.

35) Ch. Methuen, *Nächstenliebe als Verkündigung: Das diakonische Amt der Katharina Schütz Zell (1497/8-1562)*, ed. A. M. von Hauff, *Frauen gestalten Diakonie Band I: Von der biblischen Zeit bis zum Pietismus*, (Stuttgart: W. Kohlhammer GmbH, 2007), 309-319.

있다. 그녀는 당시 여성으로서 설교할 수 없고, 신학연구와 가르칠 수 없는 상황에서 성서 말씀선포를 위한 동등한 여성목사 직무를 위해 싸웠으나, 동료 남성 신학자들의 반대로 인해 목회적 말씀사역직무를 자선적이며 기관적인 디아코니아형태로 결합시켜 수행하였다. 이러한 그녀의 활동은 결과적으로 성서에 나타난 말씀선포와 디아코니아사역의 통일성을 이루는 개신교 디아코니아발전에 기여했으며, 그 당시 여성들에게 깊은 영향을 주었다.

나아가 여성종교개혁자로 스위스 취리히와 바젤에서 활동한 비브란디스 로젠블라트(Wibrandis Rosenblatt: 1504-1564)는 ‘주님 안에서 봉사자’로, 예수의 제자로서 종교개혁의 원리인 “오직 성서로만”을 실천한 ‘말씀의 행동가’가 되어 불사조처럼 합리적 디아코니아를 수행하였다. 그녀는 성서에 나타난 예수의 복음은 두 가지 요소인 ‘말씀’과 ‘행동’으로 구성되었으며, 이는 “말씀의 행동으로” 그리고 “행동의 말씀”이 되어야 하며, 예수의 복음에 기초한 디아코니아를 “기독교의 심장”으로 이해하였다.<sup>36)</sup> 그녀가 수행한 디아코니아는 마태복음에 나타난 복음의 핵심인 살아있는 신앙의 행함을 교회봉사로 실천한 것이며, 이는 바젤교회공동체가 “교회는 항상 개혁되어야 한다”는 방향 속에서 진정한 교회회복을 위해 디아코니아를 실천한 것으로 볼 수 있다.

이러한 종교개혁전통에서 디아코니아의 꽃을 피운 경건주의와 각성운동시기에 여성디아코니아직무와 활동들이 다양하게 변화되어갔다. 먼저, 경건주의 속에서 여성디아코니아직무가 말씀선포사역과 함께하는 여성사제직무형태로 발전된 것이다. 경건주의자 친첸도르프는 헤른후트 공동체(Hernhut Brüdergemeine) 안에서 그동안 남성중심의 신학에 의해 여성이 “단점을 가진 성”이며 종속적 가치를 가진 자로 평가절하 되고 멸시받는 여성지위풍습을 타파했다. 경건의 영성이 일상적인 삶으로 스며든<sup>37)</sup> 이 공동체 안에서 여성들은 본질적으로 동등한 가치를 가지는 존재들로 여성지도력을 발휘하였는데, 이에 대한 신학적 근거는 하나님의 삼위일체 동등성이다. 이 세 위격은 서로 사랑하는 가운데 서

36) I. Bossart, "Wibrandis Rosenblatt (1504-1564) - "euer Diener im Herrn" oder: Das Wort gewinnt Gestalt im Tun," ed. A. M. von Hauff, *Frauen gestalten Diakonie Band I: Von der biblischen Zeit bis zum Pietismus*, (Stuttgart: W. Kohlhammer GmbH, 2007), 323-326.

37) 김경은, “일상과 영성의 통합의 관점에서 본 영성지도,” 『신학과 실천』 44(2015), 284.

로를 위해 섬김으로 하나가 되며, 특히 성령은 어머니역할에 해당하며, 이는 신앙인들 사이에서 여성들을 폭넓은 사회적 해방으로 이끌었다.<sup>38)</sup> 여기서 여성들은 장로안수임직을 받았고, 모든 중요한 문제들을 함께 결정하는 직무를 수행하였다. 특히 안나 리슈만(Anna Nischmann)은 헤른후트 공동체에서 디아코니아사역을 넘어 여성설교자로서 인정받고 활동하였다. 안수 받은 여성목사로 그녀는 남성과 동등한 지위에서 직무를 수행하면서, 여성안수임직예식에 친첸도르프와 함께 축복기도를 하였다.<sup>39)</sup> 이 공동체에서 여성들은 하나님의 여제사장들로 직무를 수행하며, 지역교회공동체 밖에서도 말씀선포의 직무를 수행하였다. 이처럼 여기서는 여성디아코니아직무가 말씀사역과 결합된 여성사제직무형태임을 보여준다.

그러나 무엇보다도 여성디아코니아직무가 전문적인 형태로 발전한 것은 19세기 각성운동 속에서 테오도어 흘리트너(Th. Fliedner)와 함께 카이저스베르트((Kaiserswerth)를 중심으로 한 여성들의 디아코니아활동이다. 비록 비혁론이 동시대 속에서 가족원리에 의한 어머니로서 여성의 역할을 중시하였고, 여성들의 교육받을 권리를 장려하며 나아가 “개신교속에서 여성사역”에 대해 강조하였을지라도,<sup>40)</sup> 그에게서 여성디아코니아직무는 뚜렷해 보이지 않는다. 이와는 달리, 흘리트너는 개신교에 남성중심적인 과도한 비중을 교정하였고, 은총의 하나님에 대한 진정한 경건은 영혼구원 중심에 있는 디아코니아활동으로 특히 경건의 여성적 의미를 발견하였으며, 이는 성서 사도시대에 하나님나라를 위해 활동한 여성들의 의미를 수용한 것이다.<sup>41)</sup> 그는 카이저스베르트((Kaiserswerth)에서 아내 프리드리케 흘리트너(Friedricke Fliedner)와 함께 복음에 근거한 교회의 여성안수집사직무(Diakonissen)를 회복갱신 하였고, 여성

38) P. Zimmering, "Zinzendorfs Trinitätslehre. Eine Herausforderung und Bereicherung in systematisch-theologischen Überlegungen der Gegenwart," *EvTh* 51 (1991), 232.

39) E. Förster, *Diakonie in der Brüdergemeine. Zum 200. Todestag von Graf Nikolaus Ludwig von Zinzendorf am 9. Mai, IM* 50, (1960), 135.

40) M. Köig, "Die Frau in der Diakonie", ed. Th. Schober, *Das Recht im Dienst einer diakonischen Kirche*, (Stuttgart: Quell Verlag, 1980), 180 (179-184)

41) F. Schnabel, *Deutsche Geschichte im 19. Jahrhundert, IV. Band. Die religiösen Kräfte*, (Freiburg: Herder, 1955), 420-422.

안수집사를 세워 전문직업인으로 병자들을 돌보게 하였다. 특히 호리트리케는 어린이구호사업을 했던 사람으로 1836년에 최초로 “어머니의 집”(Mutterhaus) 기관의 의장이 되었다. 이 기관에서 간호와 가르치는 일을 위한 여성안수집사 양성교육이 시작되었고, 교육받은 여성들은 교도소 수감자들과 환자를 돌보며, 가난한 자들, 어린아이들을 돌보고 교육하는 일에 종사했고, 나이팅게일도 1850/51년에 이곳에서 여성안수집사들로부터 환자간호를 배웠으며, 이미 1898년에 여성안수집사들이 약 6천 4백 명이였다.<sup>42)</sup>

이처럼 다양한 디아코니아활동으로 발전하는 디아코니아기관들 속에서 평신도 여성신학자로 사역한 호리트리케는 카롤리네 흘리드너(Caroline Flidner)와 함께 목회돌봄의 중요성을 목표로 하였다. 이는 하나님나라 현실성에 대한 신학적 이해 속에서 여성안수집사직무에 목회돌봄을 결합시킨 것으로, 성장하는 디아코니아기관들 속에 하나님말씀으로부터 경건의 영성과 동력을 얻음으로 디아코니아정체성을 보존하기 위한 것이다.<sup>43)</sup> 이러한 디아코니아활동은 개신교회 안에서 미혼여성 직업으로 승인된 지위를 얻었고, 당시 이들의 병원간호 개혁은 사회에서도 최초로 인정받는 하나의 모범상이 되었다. 이처럼 카이저스베르트에서 여성안수집사들이 전문성을 가지고 사회에서 중추적인 역할을 한 것은 여성안수집사직무의 세시대적인 부활이었고, 유럽전역에 디아코니아 모범상으로 각인되었다. 다른 한편으로 보델슈빙히의 디아코니아기관에서 여성 에바 폰 틸레-빙클리스(Eva von Tiele-Wincklers)는 1890년에 “평화보호기관”(Friedenshort) 이름의 병원시설을 설립하여 환자뿐 아니라, 고아와 가정폭력당하는 아동들을 돌보았고, 이곳에서 사역하는 여성안수집사들이 20세기 초기 1905년에 50명이었고, 1930년에 700명에 이르렀다.<sup>44)</sup> 그녀는 경건각성중심에

42) R. Albrecht, "Die Wurzeln der weiblichen Diakonie in Pietismus und Erweckungsbewegung," ed. J-Ch. Kaiser/ R. Scheepers, *Dienerinnen des Herrn. Beiträge zur weiblichen Diakonie im 19. und 20. Jahrhundert*, (Leipzig: Evangelische Verlagsanstalt GmbH, 2010), 109-110.

43) D. Gebhard, "Friderike(1800-1842) und Caroline Flidner(1811-1892). Pionierinnen diakonischer Seelsorge," ed. P. Zimmerling, *Evangelische Seelsorgerinnen. Biografischer Skizzen, Texte und Programme*, (Göttingen: Vandenhoeck & Ruprecht, 2004), 171.

44) U. Gause, "Diakonissen und Bibelauslegung," ed. M. Sohn-Kronthaler, *Fromme*

전적으로 하나님의 은혜가 놓인 성서해석을 통해 19세기 여성 디아코니아활동에 깊은 영향을 주었다.

결론적으로 교회의 경건, 각성운동시대 속에서 여성들은 성령의 어머니역할로, 하나님은혜에 대한 성서해석을 통해 디아코니아직무를 수행하였고, 마침내 최초로 사회에서까지 인정받는 여성안수집사직무의 전문화를 이룩하였다. 무엇보다도 이러한 직무수행 가운데 목회돌봄과 디아코니아를 밀접하게 결합시킨 것은 오늘날 현대 목회 및 특히 여성목회영역에 중요한 도전을 준다.

## V. 오늘날 한국 개신교회 집사직무와 여성디아코니아사역에 대한 도전들

### 1. 교회직제로서 집사직무 정체성회복에 대한 도전들

오늘날 교회가 교파에 따라 아주 다양한 직제형태를 가질지라도, 개신교는 집사직무에 대한 숙고와 갱신을 필요로 한다. 교회의 지도력직무들은 근원적으로 예수제자 공동체에 맞닿아 있는 것으로 초기교회는 디아코니아공동체로서 예수제자공동체임을 보증 받았고, 교회의 사도적인 목사직무와 집사직무를 동등하게 수립하였다. 이러한 말씀사역직무와 동등한 집사직무가 중세에 소멸되어 교회는 사제직 일방주의의 지배수직위계질서구조 속에서 타락되었다. 이제 종교개혁운동으로 개신교에서 회복된 교회의 집사직무는 지배적인 수직위계질서구조를 타파하고 동등한 위치에서 섬기는 종신직의 교회직무이며, 이는 20세기에 폭넓게 활력을 얻었다. 즉, 1982년에 세계교회협의회(WCC)의 모든 회원교회들의 입장에 의해서 저변 확산된 리마선언에 나타난 집사직무이다. 또한 로마-카톨릭은 제 2바티칸 공의회 이래로 평신도 지도력으로 향존직 집사직무를 회복하였다. 제 2바티칸공의회에서 새로운 집사직무에 대한 수용은 로마교회의 개혁하는 용기를 보였으며, 갱신되어진 교회형태로 길을 열어놓은 것이다. 이처럼

오늘날 개신교입장에서나 카톨릭 입장에서 집사직무에 대한 근원적인 정체성 회복은 계속 진행되고 있다고 볼 수 있다.

이러한 맥락에서 현재 유럽의 교회들은 개신교 디아코니아전통 속에서 성서에 나타난 집사직무를 종신직으로 세워 기독교사회복지 전문직업가로 활동하도록 하고 있다. 이를테면, 독일과 스위스 교회들은 안수집사직무를 디아코니아 사역에 종사하는 직무로 인정하여 개혁신교회 속에서 전체적으로 통일적인 구조를 만들었다. 즉, 칼빈의 전통 속에 있는 서부스위스 개혁신교회들은 디아코니아 사역에 대한 안수규율을 만들었으며(스위스개혁신교회연합 제3권<교회공동체>, 문서결론 중에서), 또한 루터교 총회에서는 집사들이 교회의 직제로서 안수임직을 통하여 디아코니아활동을 수행하고 있다.<sup>45)</sup> 그런데 이러한 여성, 남성 디아코니아직무가 19, 20세기 이래로 점차적으로 사회복지활동의 전문성을 강조함으로 디아코니아기관 속에서 종교개혁기초위에 세워진 말씀신앙과 실천적 봉사의 통일성이 점점 약화되는 점이다. 즉, 목회직무와 병행하는 디아코니아직무가 육체적, 정신적, 영적, 재정적, 사회-문화적, 정치적 등으로 소외되거나 위기에 놓인 자들을 돌보는 전문성과 전문지식분야들에 대한 요구로 인해 기독교 신앙의 디아코니아기관 속에서 점점 예배와 기도회가 위축되며, 신앙의 영성강화는 종사자들에게 단지 전시적인 행동으로 보이며, 영적이고 예배의 삶은 소그룹과 소공동체의 주제로 밀려나고 있다.<sup>46)</sup> 또한 교회의 디아코니아활동을 위해 국가가 재원을 지원함으로 디아코니아가 국가행정지시에 종속된 세속화된 활동으로 전락되는 위험성이다. 분명한 것은 여성과 남성 안수집사(기독교사회복지전문가)들은 교회직무에 속하며, 신학적으로 성찰된 디아코니아정체성에 대한 전문지식과 영성강화 교육을 통해 디아코니아활동을 수행해야만 한다. 즉, 교회의 직무로서 디아코니아직무는 목회직무를 돕는 파트너로서 하나님나라

45) M. Järveläinen, "Diakonie als Ausdruck des Glaubens und Lebens der Kirche in der Evangelisch-Lutherischen Kirche Finnlands," ed. P. Philippi/ Th. Strohm, *Theologie der Diakonie. Ein europäischer Forschungsaustausch*, (Heidelberg 1989), 23-25.

46) T. Zippert, "Das Diakonenamt in einer Kirche wachsender Ungleichheit - Neubegründung seiner T. Zippert," ed. R. Merz/ U. Schindler/ H. Schmidt, *Dienst und Profession*, (Heidelberg: Universitätsverlag Winter GmbH, 2008), 57-66.



현실화를 위해 교회와 사회를 섬기기에 통일성 있는 교육과정을 필한 전문직무로 승인해서 말씀사역의 목회직무와 함께 적절한 급여를 받도록 해야 한다.

이제 분명한 것은 오늘날 교회들이 하나님 말씀인 성서에 뿌리를 내리고 있다면, 교회와 이웃을 돌보는 일을 전담하는 성서적인 집사직무를 다시 회복해야만 한다. 즉, 초기기독교 공동체에서 디아코니아직무가 목사직무와 밀접하게 목회영역 속에 자리했듯이, 오늘날 교회론 속에서 목회영역으로 집사직무와 목사직무의 사역이 회복되어야 한다. 이는 디아코니아활동의 전문적인 목회 혹은 영적인 직무를 위해 일상적 목회적 돌봄의 디아코니아가 밀착된 것을 의미한다. 그로써 말씀사역봉사의 목사직무와 디아코니아사역의 집사직무가 협동적으로 교회와 이웃을 섬김으로 진정한 예수제자교회 공동체를 만들어가야 한다. 오늘날 특히 한국교회구조 속에서 집사직무가 다음 단계(장로)로 오르기 위한 것이라면, 이는 중세 로마 카톨릭교회의 수직위계질서구조 속에서 타락된 교회를 보여주는 것이다. 이러한 관점에서 오늘날 한국교회는 기독교전통 속에 관통하는 섬기는 교회공동체회복을 위해 디아코니아전문 안수집사직무와 역할 기능회복에 대한 도전을 진지하게 해결해야 할 것이다.

## 2. 여성안수집사직무를 통한 교회여성사역에 대한 도전들

초기 교회공동체와 오늘날 교회들 사이에 놓인 사회문화적 상황 차이 속에서 고대교회 여성안수집사직무에 맞닿은 여성안수집사직무를 재건하려는 것은 의미가능한가? 또한 역사 속에 존속해온 여성안수집사직무 의미가 오늘날 교회 속에서 여성직무들에게 주는 도전을 무엇일까? 먼저, 우리가 기독교전통 속에서 진행된 여성안수집사직무를 동일하게 오늘의 교회에게 재건시키려 한다면, 이는 특히 여성안수집사직제를 경험하지 않은 한국교회에게 근본적으로 방법적인 무리함이 따를 것이다. 따라서 오히려 우리는 역사 속에서 전수된 여성디아코니아직무들을 규범적으로 이해하여 그 활동의미를 도출해서 오늘날 여성직무들을 위한 성찰과 도전으로 삼는 것이 한층 설득력 있을 것이다.

그렇다면, 교회사 속에서 교회직제 가운데 규범적 형태로 존재해온 여성디아코니아직무가 오늘날 교회여성 직무들에 줄 수 있는 의미들은 무엇일까? 먼저,

여성디아코니아직무는 하나님나라 통치방식인 섬김의 정체성위에서 복음을 받드는 교회여성의 사도적 공적지도력이며, 이는 사회-문화적으로 여성을 해방시킨 형태이다. 특히 신약성서를 관통하는 핵심단어 "봉사하다"(diakonein)에 기초한 여성디아코니아직무는 가부장적 사회문화와 제도에 의한 성차별, 계급차별을 극복하고, 여성들의 인간존엄과 사회적 위상과 역할을 완전히 바꿔놓은 여성해방형태이다. 이렇듯 여성해방의미를 포함한 성직으로서 여성안수집사직무에 대해 끊임없이 가부장적 구조세력은 도전해왔고, 그로인해 각 시대마다 굴절이 있었음에도 교회공동체에서 여성들은 중단없이 섬김의 영성으로 생명을 구원하는 공적직무를 수행해왔다. 즉, 생계돌봄 영역에서 가난한 자들의 일용할 양식을 제공하며 특히 환자간호역할의 여성안수집사직무는 사회에서까지 인정받는 최초의 여성전문직업의 길을 열었다.

나아가 교회사 속에서 복음에 기초한 여성디아코니아직무를 통한 교회개혁과 여성의 관점에서 성서해석에 의한 디아코니아활동의 의미발견이 중요하다. 교회가 복음을 벗어나 남성위주의 수직위계질서로 치달을 때, 교회로부터 여성디아코니아직무에서 퇴출당한 여성들은 대안교회형태로 수도원공동체에서 디아코니아활동으로 사회적인 위기를 돌봤다. 특히 종교개혁운동이 확산되는 시기에 여성들에게 주어진 교육기회는 여성의 관점에서 "오직 성서로만" 원리에 근거한 성서해석을 통해 여성디아코니아의미를 발견하였다. 즉, 여성종교개혁자들은 남성들 손안에 갇힌 성서해석에 대항하여 성서에 나타난 하나님의 여성상발견과, 칭의신앙의 만인사제 소명에 입각한 섬김의 여성디아코니아직무를 수행하였다. 또한 성서해석을 통해 하나님나라 복음중심에 놓인 디아코니아를 발견하였고, 디아코니아활동을 위해 하나님 말씀에 의한 경건의 영성을 중시하여 여성디아코니아직무에 목회돌봄을 결합시켰다. 이들은 여성안수집사로, 여성신학자로, 여성목회자로 여성디아코니아직무를 수행하였고, 교회의 목회사역직무와 디아코니아직무가 분리될 수 없음을 입증한 진정한 교회사역자들이다.

이제 우리는 여성디아코니아직무를 통해 발견한 의미들로부터 오늘날 여성사역에 대해 도전받는다. 먼저, 오늘날 교회목회와 관련해 볼 때, 지배가부장적 교회를 극복하기 위한 섬김의 질서위에 기초한 디아코니아교회가 요청된다. 이는 오늘날 현대 교회에서 목회돌봄과 디아코니아를 밀접하게 연관시킨 목회회

복을 의미한다. 오늘날 특히 여성목회와 관련해 보자면, 그동안 여성해방을 위해 여성들이 비판적 관점에서 성서를 해석한 결과, 가부장적 교회문화와 현실 변화를 위해 ‘해방투쟁 컨셉’을 실천하는 “여성교회”를 대안으로 제시하기도 하였다.<sup>47)</sup> 이 여성교회는 성서 속에 해방전통을 경험하는 여성(과 남성)들이 교회를 변화시켜 해방을 얻고, 또한 타자를 해방시키는 대안교회운동이라 할 수 있다. 그러나 ‘해방투쟁 컨셉’에 근거한 여성교회 안에서도 현실적으로 여성들에 의한 지배가부장적 사고와 행동으로 인해 해방공동체성과 연대성경험이 미약해 보인다. 따라서 오늘날 여성목회를 위해 진정한 대안은 지배군림구조를 극복하는 ‘섬김 컨셉’에 의한 디아코니아교회 회복이 중요하다. 왜냐하면 예수 제자 공동체로서 교회의 본질은 성별, 계급, 인종을 넘어서 구원해방을 위해 신앙인들이 동등하게 함께 모여 섬기는 디아코니아교회이기 때문이다. 교회역사 속에서 말씀사역과 디아코니아사역을 결합시킨 디아코니아교회에서 수많은 여성들이 안수집사 혹은 사제로 사역의 해방을 경험하였고, 또한 타자의 해방을 위해 육체적, 정신적, 영적, 물질적으로 돕는 연대를 하였다. 디아코니아는 자신의 권리회복과 다른 사람의 권리를 위해 봉사하는 자유를 구현한다. 그러므로 오늘날 진정한 여성목회사역은 섬김 원리에 기초한 디아코니아교회의 본질과 직무구조를 수립해서 교회 안팎에서 고통당하는 자들을 돌봄으로 해방구원의 하나님나라를 이 땅위에 현실화시키는 방향으로 나아가 할 것이다.

## VI. 나가는 말

기독교 역사 속에서 교회는 인간들이 만들어 놓은 사회문화적인 남성중심의 가부장적인 위계질서를 강화시키면서 대부분이 지배적이고 군림하려는 구조 속에 스스로 안주할 때 생명력을 잃어갔다. 그러나 예수의 복음을 보존하는 교회공동체는 섬기시는 그리스도의 생명력 있는 해방구원의 말씀을 끊임없이 사

47) E. S. Fiorenza, *Bort statt Steine. Die Herausforderung einer feministischen Interpretation der Bibel*, (Genossenschaft Edition Exodus: Freiburg/ Schweiz, 21991), 31-48.

랑으로 실천해야만 한다. 이를 위해 교회는 지배하고 으뜸이 되려는 것이 아니라 낮아지고 섬김을 준비하는 디아코니아직무구조가 동력으로 기능해야 한다. 구원하는 말씀에 대한 실천으로 디아코니아활동은 예수의 하나님나라운동 속에서 남성과 여성제자들이 동등하게 참여한 말씀선포와 결합된 활동이다. 교회의 안수집사 전통 속에서 여성과 남성들이 함께 디아코니아활동을 전담하여 수행하였다. 특히 여성안수집사들은 그리스도를 섬기는 디아코니아활동으로 여성과 아동을 교육하는 말씀사역, 성례전과 관련해서 여성들의 죄 사함의 세례를 돕고 여성 환자들에게 성찬분배를 하였고, 가난한 자에 대한 생계돌봄과 병자 간호 등을 통해 복음사역에 참여하였다. 이처럼 여성안수집사들은 교회가 생명을 살리는 예수제자공동체로 보존, 발전하는 디아코니아사역의 공적직무를 수행해왔고, 오늘날까지도 개신교에서 기독교사회복지 전문직무형태로 말씀사역과 밀접한 관계 속에서 여성안수집사사역을 수행해오는 교회들이 있다.

이제 한국 개신교는 교회직제 속에 생명을 살리는 디아코니아전담직무가 절실하게 요청된다. 왜냐하면 교회사전통 속에서 디아코니아집사직무가 본연의 정체성을 잃고 기능하지 못했을 때, 교회공동체는 군림하려는 수직위계질서구조에 의해 타락했기 때문이다. 따라서 한국개신교회는 현재 존속하는 안수집사직무에 대한 성서적, 교회사적-개신교 전통에 맞닿은 성찰을 통해 집사직무 본연의 정체성회복과 갱신하는 일이 중요하다. 그런데 한국개신교회는 지금까지 향존직 집사직무와 역할의 고유성을 보존해 오지 못하였고, 특히 여성안수집사직무를 수용하지 않았기에 이를 새로 도입하는 일은 쉽지 않을 것이다. 그럼에도 한국교회는 교회사 속에서 여성과 남성안수집사직무가 수행해온 디아코니아사역들을 위해 교회 안에 현대적 요청에 적합한 공적직무형태의 지도력을 세워야 할 것이다. 그로써 교회는 섬김의 지도력을 통해 가부장구조를 극복하며, 교회 안팎에서 육체적-영적으로 고통당하는 자들의 생명을 살리는 디아코니아교회로 회복되어야 한다. 이제 남겨진 과제는 한국교회가 성서적 남녀안수집사직무를 회복하거나 혹은 이에 상응하는 현대적인 직무역할로 목회직무를 섬기며 교회와 사회를 섬기는 안수 받은 기독교사회복지사직무도입을 진지하게 숙고, 실행하는 일이다. 이때에 분명히 할 것은 안수받은 여성과 남성 기독교사회복지전문가들은 교회직제직무에 속한 자로 디아코니아신학교육의 전문지식을

통해 기독교 정체성의 디아코니아활동을 수행해야 하며, 자칫 교회의 디아코니아활동이 국가의 재정지원을 받음으로 국가행정에 종속된 세속화된 사회복지활동으로 전락해서는 안 될 것이다.

## ■ 참고문헌 ■

- 강문규. “독일 어린이 예배에 대한 교회교육학적인 문제점 고찰.” 「신학과 실천」 39(2014), 355-388.
- 김경은. “일상과 영성의 통합의 관점에서 본 영성지도.” 「신학과 실천」 44(2015), 279-301.
- 김옥순. “성만찬 예전예배에 대한 해석학적 차원에서 디아코니아의미.” 「신학과 실천」 28(2013), 257-295.
- 김정두. “세례의 신학적 의미와 케노시스적 해석.” 「신학과 실천」 44(2015), 63-90.
- 한재동. “구원실재에 대한 참여로서 세례의 회복문제.” 「신학과 실천」 41(2014), 7-44.
- Albrecht, R. “Die Wurzeln der weiblichen Diakonie in Pietismus und Erweckungsbewegung,” ed. J.-Ch. Kaiser/ R. Scheepers, *Dienerinnen des Herrn. Beiträge zur weiblichen Diakonie im 19. und 20. Jahrhundert.*, Leipzig: Evangelische Verlagsanstalt GmbH, 2010, 104-122.
- Bejick, U. “Margarete Blarer(1493-1541). Humanistin, Reformatorin und Diakonin in Konstanz.” ed. A. M. von Hauff, *Frauen gestalten Diakonie Band I: Von der biblischen Zeit bis zum Pietismus.* Stuttgart: W. Kohlhammer GmbH, 2007, 295-304.
- Berger, K. *Was ist biblische Spiritualität.* Gütersloh: Gütersloher Verlagshaus GmbH, 2000.
- Bernoulli, W. “Calvin und das Amt der Diakone.” *Reformatio* 8(1959), 329-336.
- . “Von der reformierten Diakonie der Reformationszeit.” 197. ed. H. Krimm. *Das diakonische Amt der Kirche.* Stuttgart: Evangelisches Verlagswerk GmbH, 1953, 93-230.
- Bieberstein, S. “Engasierte Frau im Lukasevangelium” ed. A. M. von Hauff, *Frauen gestalten Diakonie.* Stuttgart: W. Kohlhammer GmbH, 2007, 93-110.

- Bossart, I. "Wibandis Rosenblatt (1504-1564) – "euer Diener im Herrn" oder: Das Wort gewinnt Gestalt im Tun." ed. A. M. von Hauff, *Frauen gestalten Diakonie. Band I: Von der biblischen Zeit bis zum Pietismus*, Stuttgart: W. Kohlhammer GmbH, 2007, 321-335.
- Erichsen-Wendt, F. "Tabita: Zur Symbolik der Kleider in Apg 9,39." ed. A. M. von Hauff, *Frauen gestalten Diakonie. Band I: Von der biblischen Zeit bis zum Pietismus*. Stuttgart: W. Kohlhammer GmbH, 2007, 111-123.
- Fiorenza, E. S. *Bort statt Steine. Die Herausforderung einer feministischen Interpretation der Bibel*. Genossenschaft Edition Exodus: Freiburg/Schweiz, 21991.
- Förster, E. "Diakonie in der Brüdergemeine. Zum 200. Todestag von Graf Nikolaus Ludwig von Zinzendorf am 9. Mai." *IM und Hilfswerk* 50(1960), 135-140.
- Gause, U. "Diakonissen und Bibelauslegung." ed. M. Sohn-Kronthaler, *Fromme Lektüre und kritische Exegese im langen 19. Jahrhundert*, Stuttgart: W. Kohlhammer GmbH, 2014, 244-254.
- Gebhard, D. "Friderike(1800-1842) und Caroline Flidner(1811-1892). Pionierinnen diakonischer Seelsorge." ed. P. Zimmerling, *Evangelische Seelsorgerinnen. Biografischer Skizzen. Texte und Programme*. Göttingen: Vandenhoeck & Ruprecht, 2004, 158-174.
- Gerstenberger, E. S/ Schrage, W. *Frau und Mann*. Stuttgart/ Berlin/ Köln/ Mainz: Verlag W. Kohlhammer GmbH, 1980.
- Järveläinen, M. "Diakonie als Ausdruck des Glaubens und Lebens der Kirche in der Evangelisch-Lutherischen Kirche Finnlands." ed.: P. Philippi/ Th. Strohm, *Theologie der Diakonie. Ein europäischer Forschungsaustausch*. Heidelberg: Heidelberger Verlagsanstalt, 1989. 23-41.
- Kirchenamt der EKD (Ed.), *Rechtfertigung und Freiheit. 500 Jahre Reformation 2017. Ein Grundlagentext des Rates der Evangelischen Kirche in Deutschland (EKD)*. Gütersloh: Gütersliher Verlagshaus, 32014.
- Kohler, M. E. *Diakonie*. Neukirchen-Vluyn: Neukircher Verlagshaus, 21995
- Köig, M. "Die Frau in der Diakonie." ed. Th. Schober, *Das Recht im Dienst einer diakonische Kirche*. Stuttgart: Quell Verlag, 1980, 179-184.
- Krimm, H. *Quellen zur Geschichte der Diakonie. Bd.II*, Stuttgart: Evangelisches Verlagswerk GmbH, 1963.

- Leder, P. A. *Die Diakone der Bischöfe und Presbyter und ihre urchristlichen Vorläufer*. Stuttgart: Evangelisches Verlagswerk GmbH, 1905.
- Luz, U. "Biblische Grundlage der Diakonie." ed. G. Ruddat/ G.K. Schäfer, *Diakonische Kompendium*. Göttingen: Vandenhoeck & Ruprecht, 2005, 17-35.
- Matheson, P. "Martin Luther und Argula von Grumbach(1492-1556/7)." *LQ* 22(2008), 1-15.
- Maurer, W. *Historischer Kommentar zur Confessio Augustana II. Theologische Probleme*. Gütersloh: Gütersloher Verlagshaus GmbH, 1978.
- Mitstreiterin des Paulus neu entdeckt." ed. A. M. von Hauff, *Frauen gestalten Diakonie Band I: Von der biblischen Zeit bis zum Pietismus*. Stuttgart: W. Kohlhammer GmbH, 2007, 125-140.
- Methuen, Ch. "Nächstenliebe als Verkündigung: Das diakonische Amt der Katharina Schütz Zell(1497/8-1562)." ed. A. M. von Hauff, *Frauen gestalten Diakonie Band I: Von der biblischen Zeit bis zum Pietismus*. Stuttgart: W.Kohlhammer GmbH, 2007, 305-319.
- Mezger, M. *Die Amtshandlung der Kirche als Verkündigung, Ordnung und Seelsorge. Band I Die Begründung der Amtshandlung*. München: Chr. Kaiser Verlag, 1957.
- Raming, I. "Zur Geschichte des weiblichen Diakonats." ed. A. Arbeitshilfe zum Diakonot der Frau, *Die Kirche braucht diakoninnen*. Münster: Claudius-Verlag, 1999, 5-8.
- Roloff, J. *Die Kirche im Neuen Testament*. Göttingen: Vandenhoeck & Ruprecht, 1993.
- Schäfer, G.K. / Hermann, V. "Geschichtliche Entwicklungen der Diakonie von der Alten Kirche bis zur Gegenwart im Überblick." ed. V. Hermann/ M. Horstmann, *Studienbuch Diakonie Band 1, biblische und theologische Zugänge zur Diakonie*. Neukirchen-Vluyn, Neukirchener Verlag, 2006, 137-165.
- Schille, G. "Konfliktlösung durch Zuordnung." ed. G.K. Schäfer/Th. Strohm, *Diakonie - biblische Grundlagen und Orientierungen. 3. Aufl.*, Heidelberg: Heidelberger Verlagsanstalt, 1998, 243-262.
- Schneemdlcher, W. "Der diakonische Dienst in der Alten Kirche." ed. H.

- Krimm, *Das diakonische Amt der Kirche*. Stuttgart: Evangelische Verlagshaus GmbH, 1953, 60-101.
- Schnabel, F. *Deutsche Geschichte im 19. Jahrhundert. IV. Band. Die religiösen Kräfte*. Freiburg: Herder, 1955.
- Schottroff, L. "Dienerinnen der Heiligen. Der Diakonat der Frauen im Neuen Testament." ed. G.K. Schäfer/Th. Strohm, *Diakonie - biblische Grundlagen und Orientierungen. 3. Aufl.*, Heidelberg: Heidelberger Verlagsanstalt, 1998, 222-242.
- Stnadharter, A. "Witwen im Neuen Testament." ed. A. M. von Hauff, *Frauen gestalten Diakonie. Band I: Von der biblischen Zeit bis zum Pietismus*. Stuttgart: W. Kohlhammer GmbH, 2007, 141-154.
- Strohm, Th./ Klein, M. (Ed.) *Die Entstehung einer sozialen Ordnung Europas. Bd. 2. Europäische Ordnungen zur Reform der Armenpflege im 16. Jahrhundert*. Heidelberg: Universitätsverlag Winter GmbH, 2004.
- Wehrli-Johns, M. "Schwestern in der Welt: Beginen in Mittelalter und Neuzeit." ed. A. M. von Hauff, *Frauen gestalten Diakonie. Band I: Von der biblischen Zeit bis zum Pietismus*. Stuttgart: W. Kohlhammer GmbH, 2007, 269-283.
- Wichern, J. H. *Sämtliche Werke III/1*. ed. Peter Meinhold, Berlin/Hamburg: Luterisches Verlagshaus, 1968,
- Zimmering, P. "Zinzendorfs Trinitätslehre. Eine Herausforderung und Bereicherung in systematisch-theologischen Überlegungen der Gegenwart." *EvTh* 51(1991), 224-245.
- Zippert, T. "Das Diakonenamt in einer Kirche wachsender Ungleichheit - Neubegründung seiner "Nomalität neben Pfarr- und Lehramt." ed. R. Merz/ U. Schindlner/ H. Schmidt, *Dienst und Profession*. Heidelberg: Universitätsverlag Winter GmbH, 2008, 46-69.



■ Abstract ■

**A Study on Women's Diaconical Office and their Role  
within the Tradition of a Comprehensive Diaconical  
Office in Christianity**

**Kim, Ok-Soon**

Our contemporary christian churches in Korea will lose a great deal of vitality and will not grow further. In this difficult situation the ministers are trying to find a new reformation. The Korean Churches should not deny that one of the causes of this present is caused by the fact that the Korean Churches have mainly concentrated on preaching ministers and have neglected the diaconical work that basically assures the connection with the churches of the disciples. As in the early Christian communities the Protestant Churches have passed on the true gospel comprising both the ministerial and the diaconical office for the disadvantaged therefore preserving and furthering the growth and maturing of the communities. In these offices women played an important part in this fundamental diaconical work to realize the Kingdom of God by serving their community and their society as demanded by the Gospel. In the course of church history the christian community has been severely damaged because the once important diaconical office has lost its original function by being repressed by the church hierarchy in the late Middle Ages. It is now important to preserve the true gospel by regenerating the important heritage of the diaconical office because the Korean Churches can only grow and mature beneficially by reflecting the comprehensive traditions of the early church with the aim of rediscovering a new way of church life.

Given these necessities this paper examines the women's diaconical office and its important role interrelation with church offices and the comprehensive diaconical office in particular. Methodically the paper uses the tradition of historical research. It will make clear that the hierarchically patriarchal structure must be overcome so that women and men are members of the same value which will create a better service because both, can contribute their particular abilities and talents. In this way the Korean Churches will find a new vitality that cannot be achieved by teaching only. All this makes it absolutely necessary that the women's diaconical office must be introduced into the Korean Churches because it once had an important role in the early christian church. Although this women's diaconical office has not yet existed within Korean Churches it must be established by all means because it is in correspondence with modern forms of women's diaconical office in which women have an established role and can give their best for the church. The Protestant Korean Churches must establish an ordained office of diaconia to enable the churches to achieve all their modern tasks as christian social diacons in order to contribute to the ministerial office for church and society as well. Consequently this paper suggests that the Protestant Korean Churches must overcome the patriarchally structured church by achieving a serving leadership and by moving toward a serving diaconical church. It must be established on the basis of the liberating Gospel in order to save those people that are in need within and without the church.

## Key Words

the Gospel of the Kingdom of God, a women's diaconia, a diaconical office, a women's diaconical office, a diaconical church.

논문접수일 : 2015년 10월 13일

논문수정일 : 2015년 11월 9일

논문게재확정일 : 2015년 11월 20일
